# Supplementary material
Source: publisher figshare collection journal article supplement (https://springernature.figshare.com/ndownloader/files/12443372)
Supplement: Supplementary file 1 [file 12443372]

## Sheet: table3
Name	chromosome	min	max	logratio	annotation
1	1	849467	249224684	0.203296194168	gain
1	2	12771	242783384	0.207136032874	gain
1	3	61892	197851986	-0.0366362353665	normal
1	4	68346	190957473	-0.0341666047414	normal
1	5	113577	180719789	0.212610905804	gain
1	6	156975	170919482	0.212783716826	gain
1	7	43361	159119707	0.221577211097	gain
1	8	158049	146295771	-0.0220727157057	normal
1	9	203862	141020389	-0.0337249462647	normal
1	10	100027	135427143	0.0696863497137	normal
1	11	230616	134938470	-0.0292564370815	normal
1	12	173787	133777902	0.204728904406	gain
1	13	19436287	115107733	0.207480317547	gain
1	14	20511673	107285437	-0.0352718829735	normal
1	15	22770422	102429112	-0.0346456325993	normal
1	16	85881	90155062	-0.019421416994	normal
1	17	526	81041938	0.392164071891	gain
1	18	136227	78014123	0.216245619786	gain
1	19	260912	58956888	-0.00925866039653	normal
1	20	61569	62915555	-0.0239358832501	normal
1	21	15006458	48097372	-0.034307923141	normal
1	22	16888900	51197838	-0.013952850611	normal
1	23	168547	135677858	-0.0145192535676	normal
2	1	849467	231259181	0.00447419113547	normal
2	1	231259181	249224684	-0.381816495259	loss
2	2	12771	242783384	-0.000767904249396	normal
2	3	61892	197851986	-0.00179922102218	normal
2	4	68346	42718461	-0.43204675791	loss
2	4	42718461	190957473	-0.000675484738088	normal
2	5	113577	180719789	0.0018374297483	normal
2	6	156975	28818158	0.62963818535	gain
2	6	28818158	132855663	0.00649296147108	normal
2	6	132855663	170919482	-0.423791963993	loss
2	7	43361	159119707	0.00640199289248	normal
2	8	158049	22506123	-0.377239791672	loss
2	8	22506123	39238536	0.0108249368591	normal
2	8	39238536	39387859	-1.89721341558	loss
2	8	39387859	146295771	0.00270202126564	normal
2	9	203862	38238359	-0.411044471969	loss
2	9	38238359	141020389	0.00365795155084	normal
2	10	100027	135427143	0.00950993939007	normal
2	11	230616	83668105	0.00306898649718	normal
2	11	83668105	134938470	-0.404433128671	loss
2	12	173787	133777902	-0.000436707839541	normal
2	13	19436287	115107733	0.00915863465938	normal
2	14	20511673	107285437	-0.000248339386159	normal
2	15	22770422	102429112	0.000614287404664	normal
2	16	85881	90155062	0.00458516576483	normal
2	17	526	40672647	-0.004850344774	normal
2	17	40672647	47052858	0.281040184919	gain
2	17	47052858	65718028	0.485247952725	gain
2	17	65718028	81041938	0.0034909923238	normal
2	18	136227	78014123	0.0204285650771	normal
2	19	260912	24459216	-0.00704513133682	normal
2	19	24459216	31793468	-0.422267398605	loss
2	19	31793468	42723918	-0.00933307996333	normal
2	19	42723918	53280617	-0.427016155339	loss
2	19	53280617	57751171	-0.0157663482956	normal
2	19	57751171	57951623	-1.23464613793	loss
2	19	57951623	58956888	-0.417826074654	loss
2	20	61569	62915555	0.00684749808001	normal
2	21	15006458	48097372	-0.0035888184414	normal
2	22	16888900	51197838	-0.000258965401086	normal
2	23	168547	135677858	-0.521014553479	loss
3	1	849467	11590641	-0.237408789307	normal
3	1	11590641	231606726	0.0202878423921	normal
3	1	231606726	249224684	-0.240380372302	normal
3	2	12771	37740909	0.269238114751	gain
3	2	37740909	242783384	-0.0127524615292	normal
3	3	61892	50187985	-0.422008932376	loss
3	3	50187985	197851986	-0.0145281531942	normal
3	4	68346	3336068	-0.018102968314	normal
3	4	3336068	49091567	-0.430846836101	loss
3	4	49091567	190957473	-0.0132235839538	normal
3	5	113577	180719789	-0.0155546534328	normal
3	6	156975	170919482	-0.013675241827	normal
3	7	43361	159119707	0.062250781743	normal
3	8	158049	146295771	-0.01101947735	normal
3	9	203862	141020389	-0.0100603940987	normal
3	10	100027	8015602	-0.197130470237	normal
3	10	8015602	8455947	0.10451613468	normal
3	10	8455947	38677822	-0.184739912376	normal
3	10	38677822	135427143	-0.00654083580242	normal
3	11	230616	66251937	-0.0139506927146	normal
3	11	66251937	85287108	0.181840336991	gain
3	11	85287108	134938470	-0.411555467465	loss
3	12	173787	56299486	-0.0221733155247	normal
3	12	56299486	133777902	0.248161314104	gain
3	13	19436287	115107733	-0.0141254485057	normal
3	14	20511673	107285437	-0.0163192960672	normal
3	15	22770422	70857066	-0.0155940953413	normal
3	15	70857066	102429112	-0.281859974339	loss
3	16	85881	90155062	-0.00975837348587	normal
3	17	526	34422223	0.00382979691264	normal
3	17	34422223	81041938	0.324689682696	gain
3	18	136227	61433054	-0.00799471078662	normal
3	18	61433054	63711458	-0.470255733253	loss
3	18	63711458	78014123	0.197898807604	gain
3	19	260912	57622075	-0.0248758647059	normal
3	19	57622075	58956888	-0.280036943618	loss
3	20	61569	62915555	-0.00980816416377	normal
3	21	15006458	48097372	-0.0221806426532	normal
3	22	16888900	51197838	-0.0122722326875	normal
3	23	168547	46949625	-0.430868379277	loss
3	23	46949625	135677858	-0.119901115233	normal
4	1	849467	42526874	-0.236715517861	normal
4	1	42526874	249224684	-0.00783953465537	normal
4	2	12771	14294487	0.00377722371365	normal
4	2	14294487	17960481	2.05590015148	ampl
4	2	17960481	242783384	-0.00908584054442	normal
4	3	61892	197851986	-0.009524676164	normal
4	4	68346	190957473	-0.00783688975797	normal
4	5	113577	180719789	-0.00898577073025	normal
4	6	156975	170919482	-0.0100845821751	normal
4	7	43361	159119707	-0.00340908016792	normal
4	8	158049	146295771	-0.0064560386814	normal
4	9	203862	141020389	-0.0102932005178	normal
4	10	100027	135427143	-0.00428522488347	normal
4	11	230616	134938470	-0.0077366567431	normal
4	12	173787	133777902	-0.00943335553021	normal
4	13	19436287	115107733	-0.00857219404159	normal
4	14	20511673	107285437	-0.0161296874664	normal
4	15	22770422	102429112	-0.00874752865586	normal
4	16	85881	90155062	0.00203483049963	normal
4	17	526	41514455	-0.000716083177987	normal
4	17	41514455	81041938	0.196061547958	gain
4	18	136227	78014123	-0.00778172797896	normal
4	19	260912	58956888	0.00440692028724	normal
4	20	61569	62915555	-0.00430290347762	normal
4	21	15006458	48097372	-0.0134432189768	normal
4	22	16888900	51197838	0.000290790918112	normal
4	23	168547	135677858	-0.555568636769	loss
5	1	849467	1624839	-0.302531476298	loss
5	1	1624839	1673826	-1.37813940541	loss
5	1	1673826	96892081	-0.383982126063	loss
5	1	96892081	249224684	0.154946356606	gain
5	2	12771	15931192	0.023088414188	normal
5	2	15931192	16415247	2.26340047484	ampl
5	2	16415247	29028033	0.00736477373524	normal
5	2	29028033	30252541	2.01920966876	ampl
5	2	30252541	242783384	0.00277083592511	normal
5	3	61892	197851986	-0.191443398989	normal
5	4	68346	132708039	-0.00935740415875	normal
5	4	132708039	145563621	0.416617893364	gain
5	4	145563621	190957473	-5.26699423833e-05	normal
5	5	113577	180719789	0.000654786250707	normal
5	6	156975	1982150	-0.460614938507	loss
5	6	1982150	170919482	-0.00122259616883	normal
5	7	43361	159119707	0.00605195591643	normal
5	8	158049	146295771	0.00069895675188	normal
5	9	203862	141020389	-0.00503122766527	normal
5	10	100027	135427143	-0.393564496941	loss
5	11	230616	134938470	0.0012724911142	normal
5	12	173787	133777902	0.150787959084	gain
5	13	19436287	67029204	-0.00445577773441	normal
5	13	67029204	67528720	-0.497981913949	loss
5	13	67528720	115107733	0.00123773006973	normal
5	14	20511673	107285437	-0.000858672493873	normal
5	15	22770422	102429112	1.61075728965e-05	normal
5	16	85881	90155062	-0.00371167550196	normal
5	17	526	35709450	0.00711806601137	normal
5	17	35709450	56989008	0.178299965137	gain
5	17	56989008	81041938	0.525907108282	gain
5	18	136227	78014123	-0.00480636536393	normal
5	19	260912	58956888	0.00540205123747	normal
5	20	61569	18183134	0.282764467976	gain
5	20	18183134	62915555	-0.0100084339176	normal
5	21	15006458	48097372	-0.0190802507436	normal
5	22	16888900	51197838	0.00818753250992	normal
5	23	168547	135677858	-0.407887703988	loss
6	1	849467	49386833	-0.487256372666	loss
6	1	49386833	249224684	0.00206163293439	normal
6	2	12771	15421118	0.0253022179616	normal
6	2	15421118	16804242	2.34638816956	ampl
6	2	16804242	242783384	-0.00202308744891	normal
6	3	61892	197851986	-0.041084047262	normal
6	4	68346	190957473	-0.030255215065	normal
6	5	113577	180719789	-0.0202282151797	normal
6	6	156975	110649018	-0.00297498670393	normal
6	6	110649018	128930534	-0.483786867867	loss
6	6	128930534	170919482	-0.0115992031763	normal
6	7	43361	159119707	0.022036804862	normal
6	8	158049	146295771	-0.0164972033548	normal
6	9	203862	141020389	-0.225821186364	normal
6	10	100027	135427143	-0.00273037104534	normal
6	11	230616	134938470	-0.0129175460626	normal
6	12	173787	133777902	-0.00963394139222	normal
6	13	19436287	115107733	-0.00490782815233	normal
6	14	20511673	107285437	-0.0303132734508	normal
6	15	22770422	102429112	-0.0111576021041	normal
6	16	85881	90155062	-0.00595623024418	normal
6	17	526	41524877	0.00635744940546	normal
6	17	41524877	81041938	0.48476749827	gain
6	18	136227	78014123	-0.0258024737959	normal
6	19	260912	58956888	-0.168858733199	normal
6	20	61569	62915555	-0.00218624676847	normal
6	21	15006458	48097372	-0.0247039930399	normal
6	22	16888900	51197838	0.010639271386	normal
6	23	168547	135677858	-0.578476429178	loss
7	1	849467	249224684	-0.206323123829	normal
7	2	12771	242783384	-0.129512280701	normal
7	3	61892	197851986	-0.282463160107	loss
7	4	68346	190957473	-0.153427388462	normal
7	5	113577	180719789	-0.180213879822	normal
7	6	156975	170919482	0.155489247883	gain
7	7	43361	159119707	0.0783566504426	normal
7	8	158049	146295771	-0.0017665053651	normal
7	9	203862	141020389	-0.273136096755	loss
7	10	100027	135427143	-0.187277092728	normal
7	11	230616	84925570	0.0158583573117	normal
7	11	84925570	134938470	-0.601550826487	loss
7	12	173787	133777902	-0.125250995384	normal
7	13	19436287	115107733	0.178237085432	gain
7	14	20511673	107285437	-0.394550116548	loss
7	15	22770422	102429112	-0.125973602288	normal
7	16	85881	90155062	-0.246234353806	normal
7	17	526	57654875	0.000495177077789	normal
7	17	57654875	81041938	0.369153137444	gain
7	18	136227	78014123	-0.104442856325	normal
7	19	260912	58956888	-0.263947453595	loss
7	20	61569	62915555	0.101948502154	normal
7	21	15006458	48097372	-0.260291528554	loss
7	22	16888900	51197838	-0.065606667511	normal
7	23	168547	135677858	-0.459671997956	loss
8	1	849467	88490150	-0.462175931464	loss
8	1	88490150	249224684	0.00216986593848	normal
8	2	12771	14534148	0.0231281452272	normal
8	2	14534148	17068169	1.72874210713	ampl
8	2	17068169	242783384	-0.00551421304683	normal
8	3	61892	197851986	-0.00992302621174	normal
8	4	68346	190957473	-0.0150770565541	normal
8	5	113577	180719789	-0.00817893252144	normal
8	6	156975	170919482	-0.0122085530367	normal
8	7	43361	159119707	-0.00240868575892	normal
8	8	158049	146295771	-0.00584693109202	normal
8	9	203862	117080132	-0.0438338582502	normal
8	9	117080132	141020389	0.302147556836	gain
8	10	100027	135427143	-0.349588228058	loss
8	11	230616	134938470	0.00357278778111	normal
8	12	173787	133777902	-0.000722000308219	normal
8	13	19436287	115107733	0.001269485399	normal
8	14	20511673	65521464	-0.0154503273108	normal
8	14	65521464	107285437	-0.386116903962	loss
8	15	22770422	102429112	-0.00525974356868	normal
8	16	85881	90155062	-0.0170775114126	normal
8	17	526	27138896	-0.00953531047635	normal
8	17	27138896	81041938	0.298045705976	gain
8	18	136227	78014123	-0.000555145093821	normal
8	19	260912	58956888	-0.0273662697362	normal
8	20	61569	62915555	0.0506872778849	normal
8	21	15006458	48097372	-0.0136045417609	normal
8	22	16888900	51197838	-0.0182806178191	normal
8	23	168547	135677858	-0.550775250298	loss
9	1	849467	149747737	0.00119898410751	normal
9	1	149747737	249224684	0.270684460917	gain
9	2	12771	242783384	0.153471267702	gain
9	3	61892	197851986	0.000882409019938	normal
9	4	68346	190957473	-0.0265401927489	normal
9	5	113577	180719789	-0.00340162632561	normal
9	6	156975	170919482	-0.00839124694137	normal
9	7	43361	159119707	0.473045914931	gain
9	8	158049	146295771	-0.00381479786673	normal
9	9	203862	141020389	-0.196355727795	normal
9	10	100027	135427143	-0.184529433952	normal
9	11	230616	134938470	-0.00874024779137	normal
9	12	173787	133777902	0.255710065774	gain
9	13	19436287	115107733	0.281176186826	gain
9	14	20511673	107285437	0.267371782612	gain
9	15	22770422	102429112	-0.0141846583491	normal
9	16	85881	90155062	0.0172519074079	normal
9	17	526	81041938	0.454442331111	gain
9	18	136227	78014123	0.0055779430949	normal
9	19	260912	58956888	0.231913830639	gain
9	20	61569	46295686	0.00955446760695	normal
9	20	46295686	62915555	0.267359267466	gain
9	21	15006458	48097372	0.00127610916121	normal
9	22	16888900	51197838	0.0181340180175	normal
9	23	168547	135677858	-0.00423953542084	normal
10	1	849467	43402764	-0.464128950971	loss
10	1	43402764	249224684	-0.00225052132221	normal
10	2	12771	15655105	0.407245400546	gain
10	2	15655105	17243179	2.26553858571	ampl
10	2	17243179	242783384	0.338508491402	gain
10	3	61892	197851986	-0.0136730914013	normal
10	4	68346	190957473	-0.0212747074555	normal
10	5	113577	180719789	-0.00937249644661	normal
10	6	156975	170919482	-0.0150558559202	normal
10	7	43361	159119707	-0.00922121879719	normal
10	8	158049	146295771	-0.0119198039344	normal
10	9	203862	128637934	-0.0213066069416	normal
10	9	128637934	141020389	0.508711983512	gain
10	10	100027	135427143	-0.00538823168379	normal
10	11	230616	134938470	0.00431128030913	normal
10	12	173787	133777902	-0.0135953452511	normal
10	13	19436287	115107733	-0.00520437347701	normal
10	14	20511673	107285437	-0.0151085624227	normal
10	15	22770422	102429112	-0.0112649090419	normal
10	16	85881	90155062	-0.0221120303101	normal
10	17	526	18761163	-0.0345158840394	normal
10	17	18761163	81041938	0.300868346909	gain
10	18	136227	78014123	-0.00791417595913	normal
10	19	260912	58956888	-0.0369010476922	normal
10	20	61569	62915555	-0.00404135023166	normal
10	21	15006458	48097372	-0.0191604152885	normal
10	22	16888900	51197838	-0.0332244937853	normal
10	23	168547	135677858	-0.0698107091507	normal
11	1	849467	97168427	-0.0608876970911	normal
11	1	97168427	249224684	0.133673116792	normal
11	2	12771	242783384	0.024950470871	normal
11	3	61892	197851986	-0.0473835033474	normal
11	4	68346	190957473	-0.0682312839197	normal
11	5	113577	180719789	-0.0421667504503	normal
11	6	156975	170919482	0.00915160757934	normal
11	7	43361	159119707	0.141222189527	normal
11	8	158049	146295771	-0.0117767370463	normal
11	9	203862	141020389	-0.0923537360714	normal
11	10	100027	135427143	-0.0806905586847	normal
11	11	230616	71651491	-0.0505363358026	normal
11	11	71651491	134938470	-0.191108159798	normal
11	12	173787	133777902	0.0725047321734	normal
11	13	19436287	115107733	0.0153912046934	normal
11	14	20511673	107285437	-0.067411424612	normal
11	15	22770422	102429112	-0.0687777513427	normal
11	16	85881	90155062	0.0134408535446	normal
11	17	526	46015817	0.00738041205552	normal
11	17	46015817	81041938	0.257761202334	gain
11	18	136227	78014123	0.0205933510368	normal
11	19	260912	58956888	-0.0299051164981	normal
11	20	61569	62915555	0.0223852931007	normal
11	21	15006458	48097372	0.0114014056217	normal
11	22	16888900	51197838	0.00809303483393	normal
11	23	168547	135677858	0.036872293136	normal
12	1	849467	42839314	-0.439657411093	loss
12	1	42839314	249224684	0.0237241920166	normal
12	2	12771	717983	-0.0177291390805	normal
12	2	717983	9741831	-0.488949039373	loss
12	2	9741831	11901385	1.51986284915	ampl
12	2	11901385	15985587	-0.515872257963	loss
12	2	15985587	17663541	2.17220942251	ampl
12	2	17663541	27256721	-0.503130525659	loss
12	2	27256721	28123264	1.53079548963	ampl
12	2	28123264	29404248	-0.497788715397	loss
12	2	29404248	30626469	1.63561651618	ampl
12	2	30626469	39778091	-0.527650735165	loss
12	2	39778091	242783384	-0.0432636313327	normal
12	3	61892	197851986	0.0180124924403	normal
12	4	68346	190957473	0.0162732774626	normal
12	5	113577	53514957	0.0180958703392	normal
12	5	53514957	79950652	-0.51405785785	loss
12	5	79950652	180719789	-0.0808469485056	normal
12	6	156975	170919482	0.0179732888109	normal
12	7	43361	159119707	0.0192616614488	normal
12	8	158049	146295771	-0.0492239272997	normal
12	9	203862	141020389	0.0142321292006	normal
12	10	100027	135427143	-0.0384633427182	normal
12	11	230616	134938470	-0.047448643213	normal
12	12	173787	133777902	0.0170586958961	normal
12	13	19436287	115107733	-0.0117107679058	normal
12	14	20511673	107285437	0.00755888870347	normal
12	15	22770422	102429112	-0.0471340427569	normal
12	16	85881	90155062	0.0241211879858	normal
12	17	526	28206654	0.0129202101934	normal
12	17	28206654	81041938	0.236292696525	gain
12	18	136227	78014123	0.0251383276861	normal
12	19	260912	58956888	0.0105625396983	normal
12	20	61569	62915555	-0.0372366603869	normal
12	21	15006458	48097372	0.0130452878049	normal
12	22	16888900	51197838	-0.0585699824264	normal
12	23	168547	135677858	0.0221211094862	normal
13	1	849467	249224684	0.00521640458603	normal
13	2	12771	242783384	0.00234485465778	normal
13	3	61892	54210633	-0.389404922015	loss
13	3	54210633	197851986	-0.0114908447315	normal
13	4	68346	41750264	-0.407659430182	loss
13	4	41750264	190957473	-0.0126421535405	normal
13	5	113577	180719789	-0.00424787216916	normal
13	6	156975	170919482	-0.00996973430375	normal
13	7	43361	159119707	0.258808684171	gain
13	8	158049	97190061	-0.00235726560626	normal
13	8	97190061	146295771	0.25562395921	gain
13	9	203862	141020389	-0.0093288045699	normal
13	10	100027	135427143	-0.00538886332555	normal
13	11	230616	73264949	0.246064007312	gain
13	11	73264949	134938470	-0.383063846218	loss
13	12	173787	133777902	-0.00172259193392	normal
13	13	19436287	115107733	0.00489945206671	normal
13	14	20511673	107285437	0.0107013075738	normal
13	15	22770422	102429112	-0.00187096364372	normal
13	16	85881	90155062	-0.0697493357733	normal
13	17	526	29106758	-0.012031750903	normal
13	17	29106758	81041938	0.526542386778	gain
13	18	136227	78014123	0.0137096444813	normal
13	19	260912	58956888	-0.00943252865595	normal
13	20	61569	62915555	0.00516533501595	normal
13	21	15006458	48097372	-0.0100133541939	normal
13	22	16888900	51197838	-0.0206188262221	normal
13	23	168547	48001329	-0.15243710759	normal
13	23	48001329	135677858	-0.485948333013	loss
14	1	849467	39369480	-0.4347875707	loss
14	1	39369480	249224684	0.00431445891061	normal
14	2	12771	9824228	0.0532770893197	normal
14	2	9824228	13182882	1.6678154458	ampl
14	2	13182882	15726302	-0.53495293033	loss
14	2	15726302	16494249	2.06219561314	ampl
14	2	16494249	242783384	-0.0105477655257	normal
14	3	61892	197851986	-0.00614263759618	normal
14	4	68346	190957473	-0.0149906241325	normal
14	5	113577	180719789	-0.00893456826206	normal
14	6	156975	170919482	-0.012509560963	normal
14	7	43361	159119707	-0.000975908786774	normal
14	8	158049	146295771	-0.00415217429383	normal
14	9	203862	141020389	-0.0223348679907	normal
14	10	100027	135427143	-0.0035117207665	normal
14	11	230616	134938470	-0.00966550049813	normal
14	12	173787	133777902	-0.00714601151197	normal
14	13	19436287	115107733	0.00772739757564	normal
14	14	20511673	107285437	-0.0151847538919	normal
14	15	22770422	102429112	-0.0159246949874	normal
14	16	85881	90155062	-0.0166794979949	normal
14	17	526	39511001	-0.0288760983928	normal
14	17	39511001	81041938	0.278499090238	gain
14	18	136227	78014123	0.00208588426258	normal
14	19	260912	58956888	-0.0357410260817	normal
14	20	61569	62915555	0.00416845216247	normal
14	21	15006458	48097372	-0.00729644369423	normal
14	22	16888900	51197838	-0.0339822407301	normal
14	23	168547	135677858	-0.016240060319	normal
15	1	849467	43139193	-0.43320526796	loss
15	1	43139193	249224684	-0.00926921746403	normal
15	2	12771	242783384	0.0326942187928	normal
15	3	61892	197851986	-0.0254172860601	normal
15	4	68346	190957473	-0.0307720122876	normal
15	5	113577	180719789	-0.0259894919277	normal
15	6	156975	170919482	-0.0255405185646	normal
15	7	43361	159119707	0.266082340198	gain
15	8	158049	146295771	-0.0237632418446	normal
15	9	203862	141020389	-0.0373554253843	normal
15	10	100027	135427143	-0.016286315712	normal
15	11	230616	134938470	-0.0148121363856	normal
15	12	173787	133777902	-0.024720304181	normal
15	13	19436287	115107733	0.268677199776	gain
15	14	20511673	107285437	-0.0326904134205	normal
15	15	22770422	67152781	-0.0503699182104	normal
15	15	67152781	102429112	0.268853103504	gain
15	16	85881	90155062	-0.0498104388304	normal
15	17	526	81041938	-0.0257673521207	normal
15	18	136227	78014123	-0.0273312008336	normal
15	19	260912	58956888	-0.0307858232093	normal
15	20	61569	62915555	-0.0211280936559	normal
15	21	15006458	48097372	-0.0401796447353	normal
15	22	16888900	51197838	-0.0232499410382	normal
15	23	168547	135677858	-0.590324517481	loss
16	1	849467	40152646	-0.40766771024	loss
16	1	40152646	249224684	0.00834834446669	normal
16	2	12771	242783384	-0.0437585884181	normal
16	3	61892	63940761	-0.463520313968	loss
16	3	63940761	197851986	-0.0200120516058	normal
16	4	68346	190957473	-0.0581733878874	normal
16	5	113577	16089100	0.0868072458095	normal
16	5	16089100	80688156	-0.28487135597	loss
16	5	80688156	180719789	0.0662107510269	normal
16	6	156975	170919482	0.0166286658368	normal
16	7	43361	159119707	0.279661690888	gain
16	8	158049	146295771	-0.0857484934214	normal
16	9	203862	141020389	0.0346113496991	normal
16	10	100027	20567471	-0.0349728780693	normal
16	10	20567471	37665315	-0.481913600024	loss
16	10	37665315	135427143	-0.0370473658549	normal
16	11	230616	71981618	0.25545126319	gain
16	11	71981618	134938470	-0.44526306598	loss
16	12	173787	133777902	0.0189456525759	normal
16	13	19436287	115107733	0.00258984293448	normal
16	14	20511673	107285437	-0.0174099099895	normal
16	15	22770422	33341024	-0.00517626558463	normal
16	15	33341024	50640936	-0.45481675837	loss
16	15	50640936	102429112	-0.0169284912912	normal
16	16	85881	90155062	-0.0401460950092	normal
16	17	526	43863901	-0.0244008937326	normal
16	17	43863901	81041938	0.470262399783	gain
16	18	136227	78014123	0.293372632559	gain
16	19	260912	58956888	-0.0274662987309	normal
16	20	61569	62915555	0.00768029037841	normal
16	21	15006458	48097372	-0.0247378357228	normal
16	22	16888900	51197838	-0.0320463750783	normal
16	23	168547	135677858	-0.514181616687	loss
17	1	752566	49574960	-0.285603330943	loss
17	1	49574960	249202755	0.0569449366143	normal
17	2	72184	12142541	0.0193768407913	normal
17	2	12142541	12604748	0.959900270115	ampl
17	2	12604748	13956771	0.174486255406	gain
17	2	13956771	14208562	1.27576660303	ampl
17	2	14208562	15960055	0.339856767679	gain
17	2	15960055	16495592	0.871960245261	ampl
17	2	16495592	243029573	0.0750849158266	normal
17	3	66894	197845233	0.0878347084944	normal
17	4	48283	190880409	0.13187254872	normal
17	5	38139	180705539	0.0881319677253	normal
17	6	204909	170898549	0.0843997125234	normal
17	7	46239	159119486	0.0639611865771	normal
17	8	176818	146293086	0.0753528789399	normal
17	9	46587	141044489	0.0326817584055	normal
17	10	135708	135430043	0.0168577350076	normal
17	11	203788	134944006	0.019011895303	normal
17	12	191619	133770975	0.0512423758215	normal
17	13	19263735	115106996	0.126576010944	normal
17	14	20213937	107282437	0.0468593245891	normal
17	15	20161372	102397836	0.0145286422023	normal
17	16	105320	90148796	-0.0393797840482	normal
17	17	18901	81047565	0.0463203287627	normal
17	18	12842	78014582	0.0776572127951	normal
17	19	267039	59106242	-0.071087370441	normal
17	20	63244	62909908	-0.0303052540346	normal
17	21	10734842	32310978	0.192648113463	gain
17	21	32310978	48098824	-0.0330784421829	normal
17	22	16079545	51169045	-0.0644940085374	normal
17	23	2704609	154929412	-0.29648679948	loss
18	1	752566	249202755	0.10084377839	normal
18	2	72184	243029573	0.135888237748	normal
18	3	66894	197845233	-0.0161917541731	normal
18	4	48283	190880409	0.181414589097	gain
18	5	38139	180705539	-0.0148290266488	normal
18	6	204909	170898549	0.146924984592	normal
18	7	46239	159119486	0.134783382616	normal
18	8	176818	146293086	-0.0145183861655	normal
18	9	46587	141044489	-0.0552149054247	normal
18	10	135708	135430043	-0.0447658404679	normal
18	11	203788	134944006	-0.0479471409624	normal
18	12	191619	133770975	0.121613693683	normal
18	13	19263735	115106996	0.00875629626418	normal
18	14	20213937	107282437	-0.0350455843433	normal
18	15	20161372	102397836	-0.050095968844	normal
18	16	105320	90148796	-0.0746176276694	normal
18	17	18901	81047565	0.145164881462	normal
18	18	12842	78014582	0.317982907145	gain
18	19	267039	59106242	0.0563354831224	normal
18	20	63244	62909908	0.0742014780136	normal
18	21	10734842	48098824	0.135684496625	normal
18	22	16079545	51169045	0.055686081786	normal
18	23	2704609	154929412	-0.414617547024	loss
19	1	776546	44843100	-0.239606027013	normal
19	1	44843100	249186681	-0.00193920257445	normal
19	2	118913	15867617	-0.0273013837169	normal
19	2	15867617	16288919	0.4218296396	gain
19	2	16288919	242996474	-0.00719110704583	normal
19	3	195315	138395559	0.0672147793559	normal
19	3	138395559	197817764	0.235955584713	gain
19	4	71420	190880409	0.0563626629347	normal
19	5	38139	180704486	0.0290605484487	normal
19	6	215423	170898549	0.00216061662924	normal
19	7	62338	159119486	-0.038718171731	normal
19	8	191076	146282249	0.029325474973	normal
19	9	46587	141027939	0.0720841827606	normal
19	10	158946	135365145	0.0615167558293	normal
19	11	204228	76511331	0.0211515921192	normal
19	11	76511331	134923760	0.172367327962	gain
19	12	191619	133770456	-0.00104433222074	normal
19	13	19622143	115083337	-0.0174494443312	normal
19	14	20379392	107282437	0.0502907751554	normal
19	15	20177092	102268000	0.0487412172596	normal
19	16	204500	90134325	0.0294714777159	normal
19	17	53011	81006387	-0.00786597713087	normal
19	18	12842	78014582	-0.0191870946242	normal
19	19	267039	59048311	0.0366456066257	normal
19	20	220303	62903830	-0.013038596991	normal
19	21	14951747	48049235	0.0367499442782	normal
19	22	16114244	51162059	-0.0179419374325	normal
19	23	2767366	154913353	-0.0659029155661	normal
20	1	776546	116181514	0.0396934034657	normal
20	1	116181514	249186681	0.251252134627	gain
20	2	118913	242996474	0.0383953431952	normal
20	3	195315	197817764	0.0401785290228	normal
20	4	71420	190880409	0.0561422416432	normal
20	5	38139	180704486	0.0439626621769	normal
20	6	215423	170898549	0.0462882588	normal
20	7	62338	23823122	0.419628014007	gain
20	7	23823122	159119486	0.251868954314	gain
20	8	191076	146282249	0.0451368934156	normal
20	9	46587	96944567	-0.380287781813	loss
20	9	96944567	141027939	0.0391452356649	normal
20	10	158946	135365145	0.0395316715191	normal
20	11	204228	70039158	0.0470003908926	normal
20	11	70039158	134923760	-0.369027304106	loss
20	12	191619	133770456	0.245564626574	gain
20	13	19622143	115083337	0.288013064249	gain
20	14	20379392	75258356	0.254713884657	gain
20	14	75258356	107282437	-0.330577865042	loss
20	15	20177092	102268000	0.0404212302173	normal
20	16	204500	90134325	0.0349039483207	normal
20	17	53011	41472051	0.0257095679267	normal
20	17	41472051	72215411	0.2269355019	gain
20	17	72215411	81006387	0.340147144412	gain
20	18	12842	78014582	0.0450890549367	normal
20	19	267039	59048311	0.046516298685	normal
20	20	220303	308560	0.47753745	gain
20	20	308560	62903830	0.0417350861423	normal
20	21	14951747	48049235	0.0444417935439	normal
20	22	16114244	51162059	0.0408464231988	normal
20	23	2767366	154913353	-0.331556617036	loss
21	1	776546	249186681	-0.0714510719881	normal
21	2	118913	14711626	-0.0753082581182	normal
21	2	14711626	16689997	0.766037166316	ampl
21	2	16689997	29394250	-0.0800059652077	normal
21	2	29394250	29894184	0.7322758	ampl
21	2	29894184	242996474	-0.0444377967123	normal
21	3	195315	197817764	0.0171747291584	normal
21	4	71420	190880409	0.0209099941133	normal
21	5	38139	180704486	-0.0109948579842	normal
21	6	215423	60196004	-0.0632420571868	normal
21	6	60196004	62933073	0.403951142258	gain
21	6	62933073	170898549	-0.0185192931809	normal
21	7	62338	159119486	-0.0854259209327	normal
21	8	191076	146282249	-0.0032127114864	normal
21	9	46587	141027939	0.0305251270192	normal
21	10	158946	135365145	0.0245365448594	normal
21	11	204228	78735567	-0.0218001079967	normal
21	11	78735567	134923760	0.13410767918	normal
21	12	191619	133770456	-0.0446188663015	normal
21	13	19622143	23273765	-0.0603412147949	normal
21	13	23273765	23319333	-2.983356	homdel
21	13	23319333	115083337	-0.0586460832696	normal
21	14	20379392	107282437	0.0164734301675	normal
21	15	20177092	102268000	0.0128577420288	normal
21	16	204500	90134325	0.00148682887768	normal
21	17	53011	37767526	-0.0608451072098	normal
21	17	37767526	56379113	-0.187890108126	normal
21	17	56379113	81006387	-0.030206625934	normal
21	18	12842	78014582	-0.047650814206	normal
21	19	267039	59048311	-0.00347250960583	normal
21	20	220303	62903830	-0.0465041891057	normal
21	21	14951747	48049235	0.00622343422556	normal
21	22	16114244	36566023	-0.0471473602378	normal
21	22	36566023	36645760	-1.016834	loss
21	22	36645760	51162059	-0.0417558924332	normal
21	23	2767366	86468354	-0.141998987681	normal
21	23	86468354	86655049	-6.190278	homdel
21	23	86655049	154913353	-0.151512639579	normal
22	1	776546	43513234	-0.239489289663	normal
22	1	43513234	249186681	0.181291336645	gain
22	2	118913	15741397	0.13982776712	normal
22	2	15741397	16459617	0.955456495238	ampl
22	2	16459617	242996474	0.168596419142	gain
22	3	195315	197817764	0.106818501704	normal
22	4	71420	190880409	0.228002797814	gain
22	5	38139	180704486	0.0874946007638	normal
22	6	215423	170898549	0.0526925015144	normal
22	7	62338	159119486	0.0445008065606	normal
22	8	191076	146282249	0.0473198939069	normal
22	9	46587	28669884	-0.193195412339	normal
22	9	28669884	141027939	0.155437781563	gain
22	10	158946	135365145	-0.205085137295	normal
22	11	204228	134923760	0.0582180899256	normal
22	12	191619	54858593	-0.190613770763	normal
22	12	54858593	133770456	0.174612342113	gain
22	13	19622143	115083337	0.0837974133982	normal
22	14	20379392	107282437	0.029795977511	normal
22	15	20177092	33033380	-0.0108976443926	normal
22	15	33033380	90550006	-0.17278012603	normal
22	15	90550006	102268000	0.172637393112	gain
22	16	204500	90134325	0.11562197239	normal
22	17	53011	81006387	0.130184597516	normal
22	18	12842	78014582	0.255600736792	gain
22	19	267039	59048311	-0.0114121900521	normal
22	20	220303	62903830	-0.00395338905914	normal
22	21	14951747	48049235	0.0335331384436	normal
22	22	16114244	51162059	0.119839937135	normal
22	23	2767366	154913353	-0.185843934055	normal
23	1	776546	249186681	-0.121666664215	normal
23	2	118913	14324008	0.30620296783	gain
23	2	14324008	14640032	1.4255767625	ampl
23	2	14640032	14711626	-1.693147	loss
23	2	14711626	16565904	1.19711111765	ampl
23	2	16565904	242996474	0.289738168822	gain
23	3	195315	197817764	-0.132753502492	normal
23	4	71420	190880409	0.100879492526	normal
23	5	38139	180704486	-0.143684115842	normal
23	6	215423	170898549	-0.157438278836	normal
23	7	62338	159119486	0.128477617082	normal
23	8	191076	146282249	0.114632052052	normal
23	9	46587	141027939	-0.132232502913	normal
23	10	158946	135365145	-0.13652449601	normal
23	11	204228	134923760	-0.13550201691	normal
23	12	191619	133770456	-0.129872489947	normal
23	13	19622143	115083337	0.147164703383	normal
23	14	20379392	107282437	-0.123439329919	normal
23	15	20177092	102268000	-0.134573461538	normal
23	16	204500	90134325	-0.102919994406	normal
23	17	53011	81006387	0.265519208174	gain
23	18	12842	78014582	0.104865953302	normal
23	19	267039	59048311	-0.0725854841312	normal
23	20	220303	62903830	-0.0934893456201	normal
23	21	14951747	48049235	0.0937625919449	normal
23	22	16114244	51162059	0.115261443746	normal
23	23	2767366	59297121	0.125306519364	normal
23	23	59297121	154913353	-0.15684680848	normal
24	1	776546	58034936	-0.249474583603	normal
24	1	58034936	249186681	0.0365996355265	normal
24	2	118913	15965788	0.0922450070507	normal
24	2	15965788	17384925	0.5781546125	gain
24	2	17384925	242996474	0.0276579249917	normal
24	3	195315	197817764	0.0483134866009	normal
24	4	71420	190880409	0.0750920116537	normal
24	5	38139	180704486	0.0392863946057	normal
24	6	215423	170898549	0.0223313042358	normal
24	7	62338	159119486	-0.00738078829063	normal
24	8	191076	146282249	0.0259284456717	normal
24	9	46587	141027939	0.0310835955613	normal
24	10	158946	135365145	0.0368857244588	normal
24	11	204228	134923760	0.0482086973613	normal
24	12	191619	133770456	0.03704829045	normal
24	13	19622143	115083337	0.000573060053455	normal
24	14	20379392	107282437	0.0599007988236	normal
24	15	20177092	102268000	0.0267611649697	normal
24	16	204500	90134325	-0.0104764811554	normal
24	17	53011	81006387	-0.0526706919213	normal
24	18	12842	78014582	0.0105906056463	normal
24	19	267039	13034081	-0.306579696641	loss
24	19	13034081	59048311	0.00340136707739	normal
24	20	220303	62903830	-0.0170695897007	normal
24	21	14951747	48049235	0.0370054874737	normal
24	22	16114244	51162059	-0.0331490152187	normal
24	23	2767366	154913353	-0.132345792214	normal
25	1	564424	24117187	-1.48746143696	loss
25	1	24117187	87074390	-0.669292288854	loss
25	1	87074390	249212609	0.222425317555	gain
25	2	30341	16029283	0.540229282926	gain
25	2	16029283	17331537	3.44302107143	ampl
25	2	17331537	84397448	0.538190818401	gain
25	2	84397448	243041305	-0.170784710836	normal
25	3	73914	59092430	-0.686450344876	loss
25	3	59092430	197845195	0.213808803128	gain
25	4	45882	190916619	-0.178113017802	normal
25	5	26142	180712204	0.211212784834	gain
25	6	154130	170911181	0.209709353515	gain
25	7	42976	111560522	-0.151190106202	normal
25	7	111560522	159118507	-0.684517304782	loss
25	8	161472	146294042	0.0885594651386	normal
25	9	204193	95352906	-0.525321134942	loss
25	9	95352906	141018925	-0.00946355611758	normal
25	10	136361	135434119	-0.684614570229	loss
25	11	17030	134927055	-0.116691068523	normal
25	12	163593	52649431	0.21320433618	gain
25	12	52649431	54299239	-0.638316616984	loss
25	12	54299239	133779017	0.22779809377	gain
25	13	19296544	44371194	-0.254058387975	normal
25	13	44371194	115105238	0.391145623167	gain
25	14	19376762	107278711	0.0101088644985	normal
25	15	20102541	102480829	-0.673302997783	loss
25	16	106271	90163070	0.237983268169	gain
25	17	32863	28682394	-0.152195856355	normal
25	17	28682394	59139160	0.757096462755	gain
25	17	59139160	81098985	1.19562977777	gain
25	18	118760	11360131	0.382419269594	gain
25	18	11360131	14148978	1.28499187946	gain
25	18	14148978	78009973	0.460444571089	gain
25	19	91742	10638857	-0.6115893534	loss
25	19	10638857	40974539	0.245906870149	gain
25	19	40974539	59092515	-0.620994391502	loss
25	20	67778	62949090	0.235725099209	gain
25	21	9832448	48090258	0.202102258456	gain
25	22	16133474	51218950	0.286331713979	gain
25	23	61091	155232863	-0.750274027903	loss
26	1	564424	97134889	-0.814448895039	loss
26	1	97134889	249212609	0.0306317234292	normal
26	2	30341	16020934	0.0680835995309	normal
26	2	16020934	16837472	6.5293779375	ampl
26	2	16837472	243041305	0.0463750028322	normal
26	3	73914	197845195	0.0296370298605	normal
26	4	45882	190916619	0.0423265601946	normal
26	5	26142	180712204	0.0398445895294	normal
26	6	154130	170911181	0.0330727465218	normal
26	7	42976	159118507	0.0514744907844	normal
26	8	161472	146294042	0.0387500110797	normal
26	9	204193	28299391	-0.835256183245	loss
26	9	28299391	141018925	0.0418955867991	normal
26	10	136361	135434119	0.0232284709036	normal
26	11	17030	134927055	0.0415894232878	normal
26	12	163593	133779017	0.0515090059328	normal
26	13	19296544	115105238	0.050586198076	normal
26	14	19376762	107278711	0.0516357751519	normal
26	15	20102541	102480829	0.0429149150841	normal
26	16	106271	90163070	-0.0697794990227	normal
26	17	32863	41383712	0.0324969788927	normal
26	17	41383712	81098985	0.856021498868	gain
26	18	118760	12539300	-0.838354813318	loss
26	18	12539300	78009973	0.0464622357863	normal
26	19	91742	59092515	0.0137456934755	normal
26	20	67778	62949090	0.0366787537178	normal
26	21	9832448	48090258	0.0377317944636	normal
26	22	16133474	51218950	0.0440587319285	normal
26	23	61091	2695318	-0.246096688816	normal
26	23	2695318	155232863	-0.853674126458	loss
27	1	564424	249212609	-0.0235929270882	normal
27	2	30341	37378286	0.473668018218	gain
27	2	37378286	243041305	-0.0335860894048	normal
27	3	73914	3853883	-0.118571883318	normal
27	3	3853883	10374942	-0.76901897331	loss
27	3	10374942	21169405	-0.0195234373022	normal
27	3	21169405	28324102	-0.869574006027	loss
27	3	28324102	197845195	-0.041270488793	normal
27	4	45882	43032908	-0.795006878624	loss
27	4	43032908	190916619	-0.075875134335	normal
27	5	26142	180712204	-0.0737430831191	normal
27	6	154130	170911181	-0.0508840929171	normal
27	7	42976	159118507	0.456730717976	gain
27	8	161472	80919333	-0.0379564748185	normal
27	8	80919333	106752824	-0.707336466399	loss
27	8	106752824	146294042	-0.0466726599122	normal
27	9	204193	44047887	-0.654100630394	loss
27	9	44047887	141018925	-0.0160840484058	normal
27	10	136361	135434119	-0.0250154450367	normal
27	11	17030	78313134	0.475549452751	gain
27	11	78313134	134927055	-0.804329474548	loss
27	12	163593	113885477	-0.0439974318993	normal
27	12	113885477	133779017	0.488175509636	gain
27	13	19296544	110390522	-0.0528534656797	normal
27	13	110390522	115105238	0.370717169048	gain
27	14	19376762	107278711	-0.0185057004997	normal
27	15	20102541	102480829	-0.0198579814527	normal
27	16	106271	34081636	0.045403573443	normal
27	16	34081636	53218767	-0.7720571916	loss
27	16	53218767	90163070	-0.0252733399469	normal
27	17	32863	46510975	0.495493123417	gain
27	17	46510975	81098985	0.870275971016	gain
27	18	118760	78009973	0.434442263455	gain
27	19	91742	59092515	-0.011385008204	normal
27	20	67778	20294957	0.455802964564	gain
27	20	20294957	62949090	-0.00427737838563	normal
27	21	9832448	48090258	-0.0463631728854	normal
27	22	16133474	51218950	0.504764530288	gain
27	23	61091	2688285	-0.241354695118	normal
27	23	2688285	155232863	-0.998653669768	loss
28	1	564424	249212609	0.0230342107649	normal
28	2	30341	243041305	-0.0273778417855	normal
28	3	73914	53017821	-0.812421878042	loss
28	3	53017821	197845195	-0.0181917771102	normal
28	4	45882	46177291	-0.396045626359	loss
28	4	46177291	190916619	0.218112037367	gain
28	5	26142	180712204	-0.36018761933	loss
28	6	154130	27456436	0.541469816913	gain
28	6	27456436	170911181	-0.000844848529681	normal
28	7	42976	159118507	0.673516899107	gain
28	8	161472	146294042	0.00816081990972	normal
28	9	204193	141018925	-0.339631193408	loss
28	10	136361	135434119	-0.344179700809	loss
28	11	17030	72278558	0.0441873972664	normal
28	11	72278558	134927055	-0.826286410363	loss
28	12	163593	133779017	0.00449158681647	normal
28	13	19296544	115105238	0.015394408868	normal
28	14	19376762	107278711	0.0105042488559	normal
28	15	20102541	102480829	-0.358424900956	loss
28	16	106271	90163070	0.0221368394811	normal
28	17	32863	31711053	0.429376421366	gain
28	17	31711053	81098985	1.03597220772	gain
28	18	118760	78009973	0.484142169583	gain
28	19	91742	59092515	0.0261960790832	normal
28	20	67778	62949090	0.164639746525	normal
28	21	9832448	48090258	-0.360458255412	loss
28	22	16133474	51218950	0.0691730581334	normal
28	23	61091	155232863	-0.900807790137	loss
29	1	564424	8250617	-0.533432229961	loss
29	1	8250617	165941515	-0.0134463487839	normal
29	1	165941515	249212609	0.401214753397	gain
29	2	30341	243041305	-0.022747584346	normal
29	3	73914	53843815	-0.644952077014	loss
29	3	53843815	197845195	-0.0472639887266	normal
29	4	45882	190916619	-0.0470648080009	normal
29	5	26142	180712204	-0.0314014376367	normal
29	6	154130	170911181	-0.0432635658748	normal
29	7	42976	159118507	-0.0229497540755	normal
29	8	161472	146294042	-0.0377657868443	normal
29	9	204193	141018925	-0.0208452086212	normal
29	10	136361	135434119	-0.0233152865417	normal
29	11	17030	47604096	0.413645509893	gain
29	11	47604096	55509353	-0.515647977672	loss
29	11	55509353	63601421	0.412527676631	gain
29	11	63601421	70543911	1.04177103475	gain
29	11	70543911	134927055	-0.625968905608	loss
29	12	163593	133779017	-0.0320095675396	normal
29	13	19296544	115105238	-0.0390723519279	normal
29	14	19376762	107278711	-0.00857955357067	normal
29	15	20102541	102480829	-0.00876407299704	normal
29	16	106271	90163070	-0.0136794524797	normal
29	17	32863	28437240	-0.00901384918483	normal
29	17	28437240	81098985	0.72866980632	gain
29	18	118760	78009973	-0.0330012985372	normal
29	19	91742	59092515	-0.0307190173931	normal
29	20	67778	30518517	-0.0197115005375	normal
29	20	30518517	62949090	0.408882078469	gain
29	21	9832448	48090258	-0.041741058694	normal
29	22	16133474	51218950	0.00364867853092	normal
29	23	61091	155232863	-0.0802361383248	normal
30	1	564424	249212609	-0.0661891533773	normal
30	2	30341	243041305	0.227871359711	gain
30	3	73914	197845195	-0.0899971298562	normal
30	4	45882	190916619	-0.102962381397	normal
30	5	26142	180712204	0.236600058451	gain
30	6	154130	170911181	0.229722116124	gain
30	7	42976	159118507	-0.0790281608473	normal
30	8	161472	146294042	-0.0903253788605	normal
30	9	204193	141018925	-0.0780616581533	normal
30	10	136361	135434119	-0.0739815346164	normal
30	11	17030	134927055	-0.0849351937972	normal
30	12	163593	133779017	-0.0758714963021	normal
30	13	19296544	115105238	0.248707693533	gain
30	14	19376762	107278711	-0.51079108035	loss
30	15	20102541	102480829	-0.0685284558797	normal
30	16	106271	90163070	-0.0634005327729	normal
30	17	32863	81098985	0.564616394035	gain
30	18	118760	78009973	0.273139552564	gain
30	19	91742	59092515	-0.0434332255145	normal
30	20	67778	62949090	-0.0610511900282	normal
30	21	9832448	48090258	-0.0881824211648	normal
30	22	16133474	51218950	0.306597886886	gain
30	23	61091	155232863	-0.0986165931311	normal
31	1	564424	249212609	0.0543699761502	normal
31	2	30341	25034722	0.426787052708	gain
31	2	25034722	243041305	0.0665768806078	normal
31	3	73914	57812842	-0.416357530035	loss
31	3	57812842	197845195	0.0510193585339	normal
31	4	45882	20470771	-0.363230358102	loss
31	4	20470771	190916619	0.220694062333	gain
31	5	26142	180712204	0.0137062495428	normal
31	6	154130	65765913	0.184162530626	normal
31	6	65765913	170911181	-0.152764798307	normal
31	7	42976	159118507	0.417088712385	gain
31	8	161472	146294042	-0.158983108642	normal
31	9	204193	141018925	0.0464308018405	normal
31	10	136361	135434119	-0.146128471138	normal
31	11	17030	59211522	0.0485374859916	normal
31	11	59211522	71674594	0.507597134496	gain
31	11	71674594	134927055	-0.407999834277	loss
31	12	163593	133779017	0.0540827507811	normal
31	13	19296544	115105238	0.0720062267025	normal
31	14	19376762	107278711	0.0857811810822	normal
31	15	20102541	102480829	0.0552471951943	normal
31	16	106271	90163070	0.0712688861624	normal
31	17	32863	29290868	0.0673957694003	normal
31	17	29290868	81098985	0.788626819664	gain
31	18	118760	78009973	0.276677793454	gain
31	19	91742	59092515	0.00404731258802	normal
31	20	67778	62949090	0.0836101454054	normal
31	21	9832448	48090258	-0.14831428049	normal
31	22	16133474	51218950	0.085385677023	normal
31	23	61091	155232863	0.0158542636586	normal
32	1	564424	77204985	-0.559576510084	loss
32	1	77204985	249212609	-0.0111003093338	normal
32	2	30341	9818241	0.0292604231216	normal
32	2	9818241	10165388	5.73963131818	ampl
32	2	10165388	15678740	2.89655987857	ampl
32	2	15678740	16412522	5.00894652632	ampl
32	2	16412522	243041305	0.00864517085939	normal
32	3	73914	197845195	0.00235467525258	normal
32	4	45882	190916619	-0.00412060807833	normal
32	5	26142	180712204	-0.000934391585563	normal
32	6	154130	170911181	-0.00487988096969	normal
32	7	42976	159118507	0.00969565160133	normal
32	8	161472	146294042	0.00491626579092	normal
32	9	204193	141018925	0.00344061823461	normal
32	10	136361	135434119	0.00322226224557	normal
32	11	17030	134927055	-0.000601208028754	normal
32	12	163593	133779017	-0.00611516069159	normal
32	13	19296544	115105238	0.00342180070244	normal
32	14	19376762	107278711	0.0129230530087	normal
32	15	20102541	102480829	0.011296455996	normal
32	16	106271	90163070	-0.00230253595273	normal
32	17	32863	30928058	0.00236762552715	normal
32	17	30928058	81098985	0.401326797615	gain
32	18	118760	78009973	0.0122611602048	normal
32	19	91742	59092515	-0.0280541582684	normal
32	20	67778	62949090	0.0111444002872	normal
32	21	9832448	48090258	0.00913448493482	normal
32	22	16133474	51218950	0.0286556275954	normal
32	23	61091	155232863	-0.0406329308456	normal
33	1	564424	43156914	-0.868032489341	loss
33	1	43156914	249212609	0.464082535417	gain
33	2	30341	15867193	0.524321437496	gain
33	2	15867193	16597913	7.05918821429	ampl
33	2	16597913	243041305	0.496863046786	gain
33	3	73914	197845195	-0.0600982135875	normal
33	4	45882	190916619	-0.0539542741353	normal
33	5	26142	180712204	-0.0547802394724	normal
33	6	154130	170911181	-0.0724832054518	normal
33	7	42976	159118507	0.482261382696	gain
33	8	161472	146294042	-0.0380265827751	normal
33	9	204193	141018925	-0.0502781210544	normal
33	10	136361	135434119	-0.050214674895	normal
33	11	17030	134927055	-0.0525809889173	normal
33	12	163593	133779017	-0.0513282128898	normal
33	13	19296544	115105238	-0.0463791157495	normal
33	14	19376762	107278711	-0.0387879094756	normal
33	15	20102541	102480829	-0.0450065712423	normal
33	16	106271	90163070	-0.0530634841395	normal
33	17	32863	43886573	-0.0391198346985	normal
33	17	43886573	81098985	0.852694998194	gain
33	18	118760	78009973	-0.0220107157789	normal
33	19	91742	59092515	-0.0644761975435	normal
33	20	67778	62949090	-0.0441555061345	normal
33	21	9832448	48090258	-0.0567687309173	normal
33	22	16133474	51218950	-0.0135530549985	normal
33	23	61091	155232863	-0.896679952191	loss
34	1	564424	164559349	0.0184871606095	normal
34	1	164559349	231250846	0.5405926057	gain
34	1	231250846	249212609	-0.877470456279	loss
34	2	30341	55801824	0.451469078654	gain
34	2	55801824	243041305	-0.00905317225893	normal
34	3	73914	54585580	-0.888067145615	loss
34	3	54585580	197845195	-0.0252031902355	normal
34	4	45882	52748287	-0.786438141475	loss
34	4	52748287	190916619	-0.0495597453493	normal
34	5	26142	180712204	-0.0180156448079	normal
34	6	154130	170911181	-0.019224282823	normal
34	7	42976	159118507	0.0849096337532	normal
34	8	161472	105953203	-0.0232798774215	normal
34	8	105953203	146294042	0.53990285976	gain
34	9	204193	141018925	-0.00337291761518	normal
34	10	136361	135434119	0.00250493346482	normal
34	11	17030	71674594	0.543558648499	gain
34	11	71674594	134927055	-0.894738365409	loss
34	12	163593	133779017	-0.00657567916631	normal
34	13	19296544	107013456	-0.0155322460835	normal
34	13	107013456	115105238	0.552700885259	gain
34	14	19376762	107278711	0.00672009173403	normal
34	15	20102541	102480829	0.0153489732693	normal
34	16	106271	90163070	0.0345374128063	normal
34	17	32863	40205925	0.0319144080393	normal
34	17	40205925	81098985	1.2200728213	gain
34	18	118760	78009973	0.0676708013817	normal
34	19	91742	59092515	0.00959157993945	normal
34	20	67778	62949090	0.0313132091407	normal
34	21	9832448	48090258	-0.023033542467	normal
34	22	16133474	51218950	0.0634833560677	normal
34	23	61091	155232863	-1.11797395585	loss
35	1	564424	143313925	0.00532184601346	normal
35	1	143313925	249212609	0.458264404515	gain
35	2	30341	18050759	0.49764773002	gain
35	2	18050759	243041305	0.00158190549902	normal
35	3	73914	197845195	-0.0174548219562	normal
35	4	45882	190916619	-0.0230713406483	normal
35	5	26142	180712204	-0.00942856119296	normal
35	6	154130	170911181	-0.0121759838851	normal
35	7	42976	159118507	0.0292270058327	normal
35	8	161472	12155105	-0.679629973114	loss
35	8	12155105	146294042	-0.0043805013814	normal
35	9	204193	141018925	-0.00334456821385	normal
35	10	136361	135434119	-0.00345420720802	normal
35	11	17030	5504149	-0.646434395333	loss
35	11	5504149	75205606	0.00325487952012	normal
35	11	75205606	134927055	-0.686398916181	loss
35	12	163593	133779017	-0.00821840032695	normal
35	13	19296544	115105238	0.112954153327	normal
35	14	19376762	51902402	0.0236945006995	normal
35	14	51902402	107278711	-0.678420836843	loss
35	15	20102541	102480829	0.000833544185714	normal
35	16	106271	90163070	0.00248920753274	normal
35	17	32863	41180031	0.0179773080098	normal
35	17	41180031	81098985	0.78961598811	gain
35	18	118760	78009973	-0.00466438813414	normal
35	19	91742	59092515	-0.00998199466412	normal
35	20	67778	62949090	0.00231502075694	normal
35	21	9832448	48090258	-0.0138738693777	normal
35	22	16133474	32987884	0.0140428849663	normal
35	22	32987884	51218950	-0.627735792914	loss
35	23	61091	2712643	-0.303209329241	loss
35	23	2712643	155232863	-0.836575609647	loss
36	1	564424	120537985	-0.0514023599021	normal
36	1	120537985	249212609	0.27911325481	gain
36	2	30341	36667195	0.274545041107	gain
36	2	36667195	243041305	-0.0545503835667	normal
36	3	73914	197845195	-0.0619317656747	normal
36	4	45882	190916619	-0.0679958977187	normal
36	5	26142	180712204	-0.0605560654424	normal
36	6	154130	170911181	-0.0696792783792	normal
36	7	42976	159118507	0.258383182885	gain
36	8	161472	146294042	-0.0663249534317	normal
36	9	204193	124161633	0.244318242746	gain
36	9	124161633	141018925	0.509368470264	gain
36	10	136361	135434119	-0.060298773064	normal
36	11	17030	71741159	0.249479106392	gain
36	11	71741159	134927055	-0.064893330651	normal
36	12	163593	133779017	-0.0605720515488	normal
36	13	19296544	115105238	0.239119222341	gain
36	14	19376762	107278711	-0.0432392870055	normal
36	15	20102541	102480829	-0.0430546042093	normal
36	16	106271	90163070	0.00114187945527	normal
36	17	32863	30824264	-0.0392955148342	normal
36	17	30824264	81098985	0.472365888962	gain
36	18	118760	78009973	0.124361695581	normal
36	19	91742	59092515	-0.0479864888267	normal
36	20	67778	62949090	-0.0479439039394	normal
36	21	9832448	48090258	0.254870061062	gain
36	22	16133474	26050872	0.199120175366	normal
36	22	26050872	51218950	-0.439187961317	loss
36	23	61091	2740664	-0.179038797358	normal
36	23	2740664	155232863	-0.868894246628	loss
37	1	564424	28237038	-0.536253424672	loss
37	1	28237038	249212609	0.190976266582	normal
37	2	30341	70544359	-0.0468064203282	normal
37	2	70544359	243041305	0.184381477202	normal
37	3	73914	60207494	-0.670010961225	loss
37	3	60207494	197845195	0.176625728984	normal
37	4	45882	190916619	-0.202056207508	normal
37	5	26142	150367307	-0.15789649389	normal
37	5	150367307	180712204	0.2184216661	gain
37	6	154130	170911181	0.167880817952	normal
37	7	42976	70150642	0.211377371796	gain
37	7	70150642	159118507	1.10911878828	gain
37	8	161472	146294042	-0.435944125395	loss
37	9	204193	141018925	-0.247317686498	normal
37	10	136361	135434119	-0.169145909304	normal
37	11	17030	78033780	0.211856279679	gain
37	11	78033780	134927055	-1.36244093372	loss
37	12	163593	56569544	-0.180000623007	normal
37	12	56569544	133779017	0.472177260505	gain
37	13	19296544	115105238	-0.0739580250732	normal
37	14	19376762	107278711	0.0873271913813	normal
37	15	20102541	102480829	-0.162063416627	normal
37	16	106271	90163070	0.205089956894	gain
37	17	32863	40153252	0.281942298765	gain
37	17	40153252	81098985	0.830398162317	gain
37	18	118760	78009973	0.253275092073	gain
37	19	91742	59092515	-0.163756408612	normal
37	20	67778	62949090	0.218041474412	gain
37	21	9832448	48090258	-0.384193637362	loss
37	22	16133474	51218950	-0.0719658425303	normal
37	23	61091	155232863	-0.698344981522	loss
38	1	564424	249212609	0.0229745558598	normal
38	2	30341	243041305	-0.104607777958	normal
38	3	73914	197845195	-0.552707965516	loss
38	4	45882	190916619	-0.150131774266	normal
38	5	26142	180712204	0.199072341641	normal
38	6	154130	170911181	0.188044321459	normal
38	7	42976	159118507	0.203920442911	gain
38	8	161472	146294042	0.219744305052	gain
38	9	204193	141018925	0.211451957158	gain
38	10	136361	135434119	0.174051382216	normal
38	11	17030	78510117	-0.117714931433	normal
38	11	78510117	134927055	-1.16884682824	loss
38	12	163593	133779017	0.103478401265	normal
38	13	19296544	115105238	0.450526375007	gain
38	14	19376762	107278711	-0.50947489182	loss
38	15	20102541	102480829	-0.110492437314	normal
38	16	106271	90163070	-0.122880030936	normal
38	17	32863	81098985	-0.0500381655571	normal
38	18	118760	78009973	-0.22585975652	normal
38	19	91742	44523183	-0.134150938686	normal
38	19	44523183	59092515	-0.54889077237	loss
38	20	67778	62949090	0.447916687335	gain
38	21	9832448	48090258	0.18912493442	normal
38	22	16133474	51218950	-0.114857473801	normal
38	23	61091	155232863	-0.572854504105	loss
39	1	564424	62626949	-0.69917277391	loss
39	1	62626949	80564699	-0.0731332513266	normal
39	1	80564699	92181912	-0.729339439228	loss
39	1	92181912	249212609	-0.000652106413231	normal
39	2	30341	2598123	0.0273516367573	normal
39	2	2598123	5456911	-0.684058765333	loss
39	2	5456911	14164596	0.00117430941469	normal
39	2	14164596	14655967	7.07018733333	ampl
39	2	14655967	15410384	-0.0678716108	normal
39	2	15410384	15513883	7.00426144444	ampl
39	2	15513883	15542048	-0.3312447	loss
39	2	15542048	16597913	7.05620186792	ampl
39	2	16597913	243041305	0.0147213511006	normal
39	3	73914	197845195	0.0105508568877	normal
39	4	45882	190916619	0.00711644870569	normal
39	5	26142	180712204	0.0128933966989	normal
39	6	154130	170911181	0.0115974060747	normal
39	7	42976	159118507	0.0193107097843	normal
39	8	161472	146294042	0.0128173886763	normal
39	9	204193	141018925	0.020488072338	normal
39	10	136361	79095438	0.0201480826151	normal
39	10	79095438	135434119	-0.709402708219	loss
39	11	17030	134927055	0.0144087453937	normal
39	12	163593	133779017	0.0126685134181	normal
39	13	19296544	115105238	0.0109097363675	normal
39	14	19376762	107278711	0.0239634676316	normal
39	15	20102541	102480829	0.0258764643756	normal
39	16	106271	90163070	0.0251995938728	normal
39	17	32863	81098985	0.030960613937	normal
39	18	118760	78009973	0.0120044052887	normal
39	19	91742	59092515	0.0126028039914	normal
39	20	67778	62949090	0.0212563432884	normal
39	21	9832448	48090258	0.0256265341721	normal
39	22	16133474	51218950	0.0309401255562	normal
39	23	61091	155232863	-0.802335754428	loss
40	1	564424	56999197	-0.645560531364	loss
40	1	56999197	249212609	0.0200133743666	normal
40	2	30341	12855464	0.0350109787143	normal
40	2	12855464	14305371	-0.722980693698	loss
40	2	14305371	16796710	4.10561995614	ampl
40	2	16796710	17455540	-0.695816177273	loss
40	2	17455540	243041305	0.0113077802694	normal
40	3	73914	197845195	0.00705854924815	normal
40	4	45882	18414885	-0.691549739496	loss
40	4	18414885	190916619	-0.00821720081421	normal
40	5	26142	180712204	0.00966398651323	normal
40	6	154130	79034264	-0.000640180175831	normal
40	6	79034264	98778746	0.487400197217	gain
40	6	98778746	104231873	-0.698024151494	loss
40	6	104231873	108115347	3.98898904679	ampl
40	6	108115347	117854172	0.0394273415909	normal
40	6	117854172	170911181	0.453841137645	gain
40	7	42976	159118507	0.0136210547865	normal
40	8	161472	146294042	0.00512560947754	normal
40	9	204193	141018925	0.00751160375725	normal
40	10	136361	135434119	0.00861748744389	normal
40	11	17030	134927055	0.0149186876172	normal
40	12	163593	133779017	0.00748833668015	normal
40	13	19296544	115105238	0.00579693780992	normal
40	14	19376762	107278711	0.0223944013026	normal
40	15	20102541	102480829	0.0181149777166	normal
40	16	106271	90163070	0.0313222807119	normal
40	17	32863	43107598	0.0263066660724	normal
40	17	43107598	81098985	0.495986293364	gain
40	18	118760	78009973	0.019428050956	normal
40	19	91742	59092515	0.0173957839235	normal
40	20	67778	62949090	0.0325412535972	normal
40	21	9832448	48090258	-1.97617298019e-05	normal
40	22	16133474	51218950	0.047611073648	normal
40	23	61091	155232863	-0.154751032813	normal
41	1	564424	249212609	-0.116677041678	normal
41	2	30341	243041305	0.186846621927	normal
41	3	73914	197845195	-0.137819009372	normal
41	4	45882	190916619	-0.145751925568	normal
41	5	26142	341825	-0.26235882	normal
41	5	341825	973433	0.819404404878	gain
41	5	973433	1256661	-0.250091048182	normal
41	5	1256661	1536566	0.939029280952	gain
41	5	1536566	1900666	-0.138708768667	normal
41	5	1900666	2586136	0.872373589189	gain
41	5	2586136	10650149	-0.167198630824	normal
41	5	10650149	12654216	0.992902092174	gain
41	5	12654216	25382734	-0.137881265887	normal
41	5	25382734	26528086	1.00105270714	gain
41	5	26528086	27809810	-0.206214135122	normal
41	5	27809810	28647311	1.42774995	gain
41	5	28647311	32436521	-0.131907696775	normal
41	5	32436521	32833918	1.57435249524	gain
41	5	32833918	35044208	-0.172052382321	normal
41	5	35044208	36130389	0.840390628	gain
41	5	36130389	36324034	-0.0535819941818	normal
41	5	36324034	37483758	0.949675436297	gain
41	5	37483758	37505771	-0.695256083333	loss
41	5	37505771	37828217	1.06532218696	gain
41	5	37828217	40820460	-0.168747912278	normal
41	5	40820460	41714772	0.8567426	gain
41	5	41714772	43239614	-0.181521267694	normal
41	5	43239614	43821833	1.3778543561	gain
41	5	43821833	44388710	-0.0817571475	normal
41	5	44388710	45986538	0.832158498413	gain
41	5	45986538	51225496	-0.17425160925	normal
41	5	51225496	53390817	0.957788730476	gain
41	5	53390817	54972283	1.52155613838	gain
41	5	54972283	56374035	-0.162814392114	normal
41	5	56374035	56712898	0.9892463625	gain
41	5	56712898	61747264	-0.161619249375	normal
41	5	61747264	62959989	0.976061180435	gain
41	5	62959989	64220001	-0.157509221069	normal
41	5	64220001	65054219	0.944446275806	gain
41	5	65054219	66375745	-0.151274559105	normal
41	5	66375745	68292104	1.51687368718	gain
41	5	68292104	70339848	-0.133492224422	normal
41	5	70339848	70948859	1.44240805714	gain
41	5	70948859	74530625	-0.130767965245	normal
41	5	74530625	78347696	0.925992529636	gain
41	5	78347696	79854005	-0.175339036109	normal
41	5	79854005	88434775	0.906717349449	gain
41	5	88434775	97490756	-0.195522891847	normal
41	5	97490756	97879787	1.18808579167	gain
41	5	97879787	117356720	-0.174593672599	normal
41	5	117356720	119847349	0.858305464706	gain
41	5	119847349	131992038	-0.158846211879	normal
41	5	131992038	132406736	0.920815162162	gain
41	5	132406736	136659937	-0.138833675557	normal
41	5	136659937	137722229	0.913826796667	gain
41	5	137722229	139254968	1.5480596729	gain
41	5	139254968	143485127	-0.165973068103	normal
41	5	143485127	144994474	0.92940254127	gain
41	5	144994474	151963330	-0.142940371632	normal
41	5	151963330	154195068	0.937956222222	gain
41	5	154195068	157008175	-0.139361875149	normal
41	5	157008175	158993042	0.914817806723	gain
41	5	158993042	159891070	1.5170892037	gain
41	5	159891070	162866796	-0.215606521387	normal
41	5	162866796	164756960	1.00723613714	gain
41	5	164756960	180712204	-0.139757587778	normal
41	6	154130	170911181	0.179090058387	normal
41	7	42976	93987341	-0.0879857261675	normal
41	7	93987341	159118507	0.237959730479	gain
41	8	161472	146294042	-0.133407727409	normal
41	9	204193	141018925	-0.120666421236	normal
41	10	136361	135434119	-0.122954209903	normal
41	11	17030	45622825	-0.0445585022622	normal
41	11	45622825	65968720	-0.308163755189	loss
41	11	65968720	67051031	1.52917283152	gain
41	11	67051031	86635119	0.0510288216859	normal
41	11	86635119	100466241	-0.354418875533	loss
41	11	100466241	126343798	0.039470931467	normal
41	11	126343798	134927055	-0.337332004236	loss
41	12	163593	133779017	0.408396343588	gain
41	13	19296544	115105238	-0.121852950458	normal
41	14	19376762	107278711	-0.12067055409	normal
41	15	20102541	102480829	0.186081670936	normal
41	16	106271	90163070	0.208206398587	gain
41	17	32863	8200690	0.217868582352	gain
41	17	8200690	81098985	0.490777549611	gain
41	18	118760	78009973	-0.0435221021411	normal
41	19	91742	59092515	-0.118047324699	normal
41	20	67778	62949090	0.210444472357	gain
41	21	9832448	48090258	-0.527392189015	loss
41	22	16133474	51218950	0.217813082548	gain
41	23	61091	155232863	-0.550325179904	loss
42	1	564424	120537985	-0.0137294222743	normal
42	1	120537985	249212609	0.342516243644	gain
42	2	30341	243041305	-0.0107555868761	normal
42	3	73914	58308621	-0.539649301551	loss
42	3	58308621	197845195	-0.0307682247722	normal
42	4	45882	100337712	-0.011574043107	normal
42	4	100337712	148268495	0.33469604893	gain
42	4	148268495	190916619	-0.036073443707	normal
42	5	26142	142110215	-0.0358296244466	normal
42	5	142110215	180712204	0.371013911318	gain
42	6	154130	170911181	-0.0231370223429	normal
42	7	42976	126846067	0.360145575867	gain
42	7	126846067	159118507	0.685084921855	gain
42	8	161472	146294042	-0.0209611835144	normal
42	9	204193	141018925	0.0542487423936	normal
42	10	136361	135434119	-0.534297816521	loss
42	11	17030	73087241	0.308853554325	gain
42	11	73087241	134927055	-0.543763884882	loss
42	12	163593	109309811	-0.0382278042328	normal
42	12	109309811	133779017	0.400726642397	gain
42	13	19296544	115105238	-0.0191838610736	normal
42	14	19376762	107278711	-0.0151574808009	normal
42	15	20102541	102480829	0.00323194580324	normal
42	16	106271	90163070	0.0125353849065	normal
42	17	32863	32267869	-0.492539101115	loss
42	17	32267869	81098985	0.367074944508	gain
42	18	118760	78009973	0.548192470155	gain
42	19	91742	59092515	-0.0141126230678	normal
42	20	67778	62949090	0.00381409703096	normal
42	21	9832448	48090258	0.00360777563469	normal
42	22	16133474	30767834	0.0275839906619	normal
42	22	30767834	51218950	-0.473602731712	loss
42	23	61091	155232863	-0.551815403169	loss
43	1	564424	26184713	-0.163401652573	normal
43	1	26184713	183319725	0.101729258793	normal
43	1	183319725	234201160	0.558824341695	gain
43	1	234201160	249212609	0.116750603484	normal
43	2	30341	20418755	0.575170485652	gain
43	2	20418755	243041305	0.1018539939	normal
43	3	73914	59130581	-0.622174144691	loss
43	3	59130581	197845195	0.0611403396877	normal
43	4	45882	190916619	-0.24476302836	normal
43	5	26142	116169214	-0.249222494596	normal
43	5	116169214	180712204	0.114844657227	normal
43	6	154130	170911181	-0.234651283729	normal
43	7	42976	159118507	0.0902378100945	normal
43	8	161472	146294042	0.0618051632029	normal
43	9	204193	141018925	-0.112223154153	normal
43	10	136361	78381820	-0.229438217811	normal
43	10	78381820	135434119	0.102175869747	normal
43	11	17030	55406200	0.0856496695605	normal
43	11	55406200	71826408	0.591758036876	gain
43	11	71826408	134927055	-0.623801948465	loss
43	12	163593	73997047	0.0766985199564	normal
43	12	73997047	133779017	0.338850623141	gain
43	13	19296544	115105238	0.0670391849302	normal
43	14	19376762	107278711	-0.203736056106	normal
43	15	20102541	102480829	-0.201386906689	normal
43	16	106271	90163070	0.110463415181	normal
43	17	32863	39980463	0.00212741639071	normal
43	17	39980463	81098985	0.912227015783	gain
43	18	118760	9840194	-0.641969110187	loss
43	18	9840194	78009973	0.0968865322957	normal
43	19	91742	59092515	0.106915035192	normal
43	20	67778	62949090	0.106844419157	normal
43	21	9832448	48090258	0.0767501094131	normal
43	22	16133474	51218950	0.135311131788	normal
43	23	61091	155232863	-0.806368767841	loss
44	1	564424	90025055	-0.774057716011	loss
44	1	90025055	249212609	0.0226216690396	normal
44	2	30341	15782266	0.563355907465	gain
44	2	15782266	16597913	7.90067872727	ampl
44	2	16597913	47519234	0.553878091504	gain
44	2	47519234	243041305	0.0196782115182	normal
44	3	73914	197845195	0.020845203574	normal
44	4	45882	190916619	0.00763758243662	normal
44	5	26142	180712204	0.0199293679644	normal
44	6	154130	170911181	0.0148066765017	normal
44	7	42976	159118507	0.0311189456925	normal
44	8	161472	59809390	0.0197867275015	normal
44	8	59809390	146294042	-0.818972768765	loss
44	9	204193	141018925	0.0251270331175	normal
44	10	136361	135434119	0.0235671314197	normal
44	11	17030	134927055	0.0311390036037	normal
44	12	163593	40122919	0.0237751680562	normal
44	12	40122919	55715719	-0.775657940506	loss
44	12	55715719	133779017	0.0241128870447	normal
44	13	19296544	115105238	0.0107887189885	normal
44	14	19376762	107278711	0.0415506172902	normal
44	15	20102541	102480829	0.0393356240961	normal
44	16	106271	90163070	0.0529777024833	normal
44	17	32863	42782214	0.0579838755334	normal
44	17	42782214	81098985	0.560102674713	gain
44	18	118760	78009973	0.014963017045	normal
44	19	91742	59092515	0.0657012009674	normal
44	20	67778	62949090	0.0458260519868	normal
44	21	9832448	48090258	0.029899791509	normal
44	22	16133474	51218950	0.0690719376616	normal
44	23	61091	2695318	0.126039064471	normal
44	23	2695318	155232863	-0.838749315244	loss
45	1	27918	143451734	-0.0298232317881	normal
45	1	143451734	143580464	-1.93482	loss
45	1	143580464	249219279	0.487690604311	gain
45	2	25142	243059305	0.0172068334176	normal
45	3	60710	197897317	0.0091978550844	normal
45	4	29861	191026128	-0.00815676722294	normal
45	5	25637	180891680	0.0058570512531	normal
45	6	60745	171047376	0.000715547323136	normal
45	7	22189	159112461	0.271532525226	gain
45	8	18535	146293428	0.0154697893258	normal
45	9	28046	141118196	-0.00182791168659	normal
45	10	60636	135520883	-0.0124260619872	normal
45	11	60824	134934174	-0.0180970300983	normal
45	12	147085	133751883	-0.0139464789166	normal
45	13	19020199	115099262	-0.0134228953975	normal
45	14	19068113	107278229	-0.00771544217687	normal
45	15	20057163	102489663	-0.0292234904271	normal
45	16	71631	90267732	0.0085461605317	normal
45	17	5157	42740995	0.00230843434343	normal
45	17	42740995	81055703	0.301925434555	gain
45	18	15050	77999803	-0.00671360321716	normal
45	19	69411	54144860	-0.0028392149088	normal
45	19	54144860	59078979	0.292769435484	gain
45	20	71424	62949310	6.92002688172e-05	normal
45	21	10860934	48098938	-0.00771862190813	normal
45	22	16050690	39207074	-0.0325303690685	normal
45	22	39207074	51237712	-0.41410910299	loss
45	23	72101	155247523	-0.747065512583	loss
46	1	27918	249219279	0.0106675867592	normal
46	2	25142	243059305	0.014082595587	normal
46	3	60710	197897317	-0.387937986826	loss
46	4	29861	191026128	0.26081012837	gain
46	5	25637	180891680	0.0137829690675	normal
46	6	60745	26645636	0.336368338323	gain
46	6	26645636	33381228	-0.314972440476	loss
46	6	33381228	171047376	0.133135095579	normal
46	7	22189	148041663	0.285330044581	gain
46	7	148041663	159112461	0.647882898551	gain
46	8	18535	146293428	0.285879168539	gain
46	9	28046	141118196	-0.371595972776	loss
46	10	60636	38652326	0.17945746114	normal
46	10	38652326	135520883	-0.119696728289	normal
46	11	60824	78419136	0.016860963725	normal
46	11	78419136	134934174	-0.969420638751	loss
46	12	147085	114767742	0.0282546613833	normal
46	12	114767742	133751883	0.488009513742	gain
46	13	19020199	115099262	0.321769694561	gain
46	14	19068113	107278229	-0.318690761905	loss
46	15	20057163	102489663	0.0130369513991	normal
46	16	71631	90267732	-0.00673509202454	normal
46	17	5157	25371796	-0.0793144945848	normal
46	17	25371796	81055703	0.596271567218	gain
46	18	15050	77999803	0.26856080429	gain
46	19	69411	59078979	-0.0121924187726	normal
46	20	71424	62949310	0.176011646505	normal
46	21	10860934	48098938	-0.0876119905771	normal
46	22	16050690	51237712	-0.0580587471264	normal
46	23	72101	155247523	-0.415743700662	loss
47	1	27918	145753463	-0.0339381233681	normal
47	1	145753463	192788501	0.303225657439	gain
47	1	192788501	249219279	0.0496090207291	normal
47	2	25142	243059305	0.0408303099208	normal
47	3	60710	197897317	-0.000161702346645	normal
47	4	29861	191026128	-0.0683593089431	normal
47	5	25637	180891680	-0.00747330548657	normal
47	6	60745	171047376	-0.0193696701721	normal
47	7	22189	159112461	0.0181917386805	normal
47	8	18535	146293428	0.0715104719101	normal
47	9	28046	141118196	0.0127359163347	normal
47	10	60636	135520883	-0.0178375144333	normal
47	11	60824	32175249	-0.0832986625	normal
47	11	32175249	55205845	0.309349555085	gain
47	11	55205845	65692570	-0.071578778626	normal
47	11	65692570	70878335	0.401481507937	gain
47	11	70878335	101225998	0.0218334262948	normal
47	11	101225998	114746975	-0.26543704142	normal
47	11	114746975	124229416	0.0559027004219	normal
47	11	124229416	134934174	-0.24396141791	normal
47	12	147085	133751883	-0.00817965835642	normal
47	13	19020199	115099262	-0.02692741841	normal
47	14	19068113	107278229	0.0475077687075	normal
47	15	20057163	102489663	-0.0819319734904	normal
47	16	71631	90267732	0.0202865439673	normal
47	17	5157	57092744	-0.0214221719792	normal
47	17	57092744	63374636	0.428129102564	gain
47	17	63374636	81055703	0.0238077272727	normal
47	18	15050	77999803	-0.0947632600536	normal
47	19	69411	59078979	-0.0159371263538	normal
47	20	71424	62949310	0.150947775538	normal
47	21	10860934	48098938	0.0980083981154	normal
47	22	16050690	51237712	0.00479256321839	normal
47	23	72101	155247523	-0.122390392053	normal
48	1	27918	43381600	-0.31307108716	loss
48	1	43381600	249219279	0.0121833831283	normal
48	2	25142	15832792	-0.000507857142857	normal
48	2	15832792	16709317	1.780597	ampl
48	2	16709317	243059305	0.0176102443439	normal
48	3	60710	197897317	0.00690604981474	normal
48	4	29861	191026128	0.144567225075	normal
48	5	25637	180891680	0.00390661323098	normal
48	6	60745	171047376	-0.0108737284895	normal
48	7	22189	159112461	0.117958626132	normal
48	8	18535	146293428	-0.00157660674157	normal
48	9	28046	141118196	-0.0108410823373	normal
48	10	60636	135520883	0.00338050440596	normal
48	11	60824	134934174	0.0960348034398	normal
48	12	147085	133751883	-0.0201568113266	normal
48	13	19020199	115099262	-0.0220907447699	normal
48	14	19068113	107278229	-0.0104375736961	normal
48	15	20057163	102489663	-0.0125330142366	normal
48	16	71631	90267732	-0.0225878323108	normal
48	17	5157	38132712	-0.0343508924485	normal
48	17	38132712	81055703	0.200933846872	gain
48	18	15050	77999803	0.126603474531	normal
48	19	69411	59078979	-0.0948594512635	normal
48	20	71424	62949310	-0.00907065860215	normal
48	21	10860934	48098938	-0.0192166431095	normal
48	22	16050690	51237712	-0.0390302183908	normal
48	23	72101	155247523	-0.454860354967	loss
49	1	27918	143580464	-0.0360693114863	normal
49	1	143580464	249219279	0.257729699769	gain
49	2	25142	48120228	0.268732982456	gain
49	2	48120228	228715716	-0.0253639812914	normal
49	2	228715716	243059305	-0.461829887955	loss
49	3	60710	197897317	-0.0406193927542	normal
49	4	29861	191026128	-0.0420954985024	normal
49	5	25637	84032994	-0.0480471456987	normal
49	5	84032994	180891680	0.204798130687	gain
49	6	60745	171047376	-0.0434983484704	normal
49	7	22189	159112461	0.226122271669	gain
49	8	18535	146293428	0.222296803371	gain
49	9	28046	141118196	-0.0404340073041	normal
49	10	60636	135520883	-0.0452812579763	normal
49	11	60824	70832851	0.212247263412	gain
49	11	70832851	134934174	-0.425621264872	loss
49	12	147085	133751883	0.209481674361	gain
49	13	19020199	115099262	-0.0398223305439	normal
49	14	19068113	107278229	-0.0480819092971	normal
49	15	20057163	102489663	-0.0528062837506	normal
49	16	71631	90267732	-0.0448929550102	normal
49	17	5157	39569745	-0.0063396043956	normal
49	17	39569745	81055703	0.604249584541	gain
49	18	15050	77999803	-0.0686213351206	normal
49	19	69411	59078979	-0.0630283971119	normal
49	20	71424	62949310	-0.0309096303763	normal
49	21	10860934	48098938	-0.0435231213192	normal
49	22	16050690	51237712	-0.0387251494253	normal
49	23	72101	155247523	-0.694739295364	loss
50	1	27918	249219279	0.0354371471792	normal
50	2	25142	243059305	0.0764327235978	normal
50	3	60710	197897317	-0.133298447921	normal
50	4	29861	27147158	-0.3619656231	loss
50	4	27147158	191026128	0.0516369497012	normal
50	5	25637	180891680	-0.0488919440054	normal
50	6	60745	50949148	0.153571968627	normal
50	6	50949148	171047376	-0.128549343417	normal
50	7	22189	159112461	0.272244887451	gain
50	8	18535	146293428	0.0870946966292	normal
50	9	28046	141118196	-0.134594103586	normal
50	10	60636	135520883	-0.147439085384	normal
50	11	60824	84087854	0.145398064354	normal
50	11	84087854	134934174	-0.345197292818	loss
50	12	147085	133751883	0.0133444721453	normal
50	13	19020199	115099262	0.0412551548117	normal
50	14	19068113	107278229	0.0929064807256	normal
50	15	20057163	102489663	-0.15821467354	normal
50	16	71631	90267732	-0.166322070552	normal
50	17	5157	38542138	0.224045678733	gain
50	17	38542138	81055703	0.567274316682	gain
50	18	15050	77999803	0.240317801609	gain
50	19	69411	59078979	-0.0555324115523	normal
50	20	71424	62949310	0.122821942204	normal
50	21	10860934	48098938	0.0241920141343	normal
50	22	16050690	51237712	-0.0330428735632	normal
50	23	72101	155247523	-0.25073757351	normal
51	1	27918	249219279	0.0157931233316	normal
51	2	25142	15191585	0.0662304787234	normal
51	2	15191585	16828482	2.79279641026	ampl
51	2	16828482	243059305	0.0484443190873	normal
51	3	60710	197897317	0.0335969905311	normal
51	4	29861	191026128	0.0368655327343	normal
51	5	25637	180891680	0.082854120569	normal
51	6	60745	171047376	0.0370947562141	normal
51	7	22189	159112461	0.0511535006468	normal
51	8	18535	146293428	0.0236394325843	normal
51	9	28046	141118196	0.00108530544489	normal
51	10	60636	135520883	0.00137600425403	normal
51	11	60824	134934174	-0.00777899570025	normal
51	12	147085	133751883	0.00441689135118	normal
51	13	19020199	115099262	0.0199415523013	normal
51	14	19068113	107278229	0.0031423446712	normal
51	15	20057163	102489663	-0.0286455277369	normal
51	16	71631	90267732	-0.038671906953	normal
51	17	5157	8107292	-0.595770149254	loss
51	17	8107292	31046526	-0.034455010101	normal
51	17	31046526	81055703	0.350528486789	gain
51	18	15050	77999803	0.0284578766756	normal
51	19	69411	59078979	-0.169417646209	normal
51	20	71424	62949310	-0.00772936155914	normal
51	21	10860934	48098938	0.0070059246172	normal
51	22	16050690	51237712	-0.10625816092	normal
51	23	72101	155247523	-0.561952511258	loss
52	1	27918	198822300	0.0240095607412	normal
52	1	198822300	249219279	0.334494046474	gain
52	2	25142	243059305	0.0158821610241	normal
52	3	60710	49194378	-0.496778543531	loss
52	3	49194378	197897317	-0.0108804629374	normal
52	4	29861	6802501	0.14482746988	normal
52	4	6802501	45415924	-0.511590958904	loss
52	4	45415924	191026128	-0.0419722197246	normal
52	5	25637	180891680	-0.00849815082411	normal
52	6	60745	171047376	-0.0113630855641	normal
52	7	22189	159112461	0.267559166882	gain
52	8	18535	146293428	0.053120994382	normal
52	9	28046	128257652	0.00301603192279	normal
52	9	128257652	141118196	-0.261783867925	normal
52	10	60636	135520883	0.0126652567609	normal
52	11	60824	134934174	-0.00143997542998	normal
52	12	147085	133751883	0.0437167436134	normal
52	13	19020199	115099262	0.0447612635983	normal
52	14	19068113	74737165	0.00104960460101	normal
52	14	74737165	107278229	-0.466698624079	loss
52	15	20057163	22853506	0.173744791667	normal
52	15	22853506	102489663	0.0011869984917	normal
52	16	71631	90267732	0.063090291411	normal
52	17	5157	36238651	0.0778457038835	normal
52	17	36238651	81055703	0.743910330062	gain
52	18	15050	77999803	0.0785583431635	normal
52	19	69411	59078979	0.159143458484	normal
52	20	71424	62949310	0.0452273051075	normal
52	21	10860934	48098938	0.00366329799764	normal
52	22	16050690	51237712	0.200752183908	gain
52	23	72101	155247523	-0.704542593377	loss
53	1	27918	49461590	-0.596447686628	loss
53	1	49461590	249219279	0.132862331818	normal
53	2	25142	16075622	0.032457839196	normal
53	2	16075622	16234546	2.68826	ampl
53	2	16234546	243059305	0.023795168925	normal
53	3	60710	8875937	0.0227162443439	normal
53	3	8875937	49678804	-0.606076745098	loss
53	3	49678804	197897317	0.0199027785458	normal
53	4	29861	191026128	0.0251966431322	normal
53	5	25637	180891680	0.0263449243622	normal
53	6	60745	171047376	0.0158904756214	normal
53	7	22189	159112461	0.00178125226391	normal
53	8	18535	146293428	0.0141148651685	normal
53	9	28046	141118196	0.00298177622842	normal
53	10	60636	135520883	0.00369949559404	normal
53	11	60824	134934174	0.00818447481572	normal
53	12	147085	133751883	0.0169047768544	normal
53	13	19020199	115099262	0.029313874477	normal
53	14	19068113	107278229	0.00443777777778	normal
53	15	20057163	102489663	0.00716400589102	normal
53	16	71631	90267732	-0.0179530828221	normal
53	17	5157	47017364	-0.0340497447584	normal
53	17	47017364	81055703	0.30019946934	gain
53	18	15050	77999803	0.00609177479893	normal
53	19	69411	59078979	-0.111007155235	normal
53	20	71424	62949310	-0.0125098454301	normal
53	21	10860934	48098938	0.00527315665489	normal
53	22	16050690	51237712	-0.0610407471264	normal
53	23	72101	155247523	-0.00551558145695	normal
54	1	27918	50970854	-0.180903412888	normal
54	1	50970854	249219279	0.279456327373	gain
54	2	25142	243059305	0.102377175341	normal
54	3	60710	25749460	-0.448590482115	loss
54	3	25749460	197897317	-0.154670747331	normal
54	4	29861	43171217	-0.418310594901	loss
54	4	43171217	191026128	0.0962963651452	normal
54	5	25637	180891680	-0.151010778957	normal
54	6	60745	171047376	0.0793369885277	normal
54	7	22189	159112461	0.422602173351	gain
54	8	18535	146293428	0.083044241573	normal
54	9	28046	141118196	-0.163888791501	normal
54	10	60636	135520883	-0.0596549042844	normal
54	11	60824	83927064	0.255903753149	gain
54	11	83927064	134934174	-0.921005696302	loss
54	12	147085	133751883	0.255615250846	gain
54	13	19020199	115099262	-0.131198079498	normal
54	14	19068113	107278229	0.0629030385488	normal
54	15	20057163	102489663	-0.470167997054	loss
54	16	71631	90267732	0.0716286349693	normal
54	17	5157	47060611	0.249163433515	gain
54	17	47060611	81055703	0.779666198347	gain
54	18	15050	77999803	0.303808841823	gain
54	19	69411	59078979	0.0255696389892	normal
54	20	71424	30371933	-0.0809948296296	normal
54	20	30371933	62949310	0.253243345633	gain
54	21	10860934	48098938	-0.162372084806	normal
54	22	16050690	51237712	0.0235822873563	normal
54	23	72101	155247523	-0.621524964238	loss
55	1	27918	95942850	-0.297739769005	normal
55	1	95942850	209509411	0.145475273212	normal
55	1	209509411	217297173	-0.326048820513	loss
55	1	217297173	249219279	0.169588030303	normal
55	2	25142	45316351	0.366146503993	gain
55	2	45316351	185519465	-0.0542102045657	normal
55	2	185519465	203799892	0.165072122538	normal
55	2	203799892	243059305	-0.316484561224	loss
55	3	60710	115345561	-0.338044340365	loss
55	3	115345561	197897317	-0.0596848568656	normal
55	4	29861	191026128	-0.0761567351305	normal
55	5	25637	51537410	0.230433583333	gain
55	5	51537410	180891680	-0.0633087116754	normal
55	6	60745	171047376	0.157372277725	normal
55	7	22189	159112461	0.162413624838	normal
55	8	18535	104788609	-0.0549574346793	normal
55	8	104788609	146293428	0.326416170213	gain
55	9	28046	141118196	-0.0502328286853	normal
55	10	60636	135520883	-0.0527799696141	normal
55	11	60824	134934174	-0.0355893673219	normal
55	12	147085	53619074	-0.0682844755805	normal
55	12	53619074	133751883	0.38480587	gain
55	13	19020199	115099262	0.102116334728	normal
55	14	19068113	107278229	-0.0730878639456	normal
55	15	20057163	102489663	-0.0770975061365	normal
55	16	71631	90267732	-0.0265848670757	normal
55	17	5157	47060611	0.0254793897996	normal
55	17	47060611	81055703	0.520023837072	gain
55	18	15050	10230405	-0.332941875	loss
55	18	10230405	77999803	0.158190031075	normal
55	19	69411	59078979	-0.0555000649819	normal
55	20	71424	62949310	0.147509549731	normal
55	21	10860934	48098938	0.139231224971	normal
55	22	16050690	51237712	-0.0473498965517	normal
55	23	72101	34039204	-0.102244	normal
55	23	34039204	155247523	-0.388703061433	loss
56	1	27918	67986190	-0.493002853746	loss
56	1	67986190	249219279	0.0580019177038	normal
56	2	25142	12996130	0.0390658878505	normal
56	2	12996130	16112026	3.89827115385	ampl
56	2	16112026	243059305	0.0575807331166	normal
56	3	60710	55593530	-0.537290323974	loss
56	3	55593530	197897317	0.0536075468435	normal
56	4	29861	191026128	0.0417162173727	normal
56	5	25637	180891680	0.0561842176564	normal
56	6	60745	108410693	0.0566015226494	normal
56	6	108410693	171047376	-0.522265305074	loss
56	7	22189	159112461	0.0429195834411	normal
56	8	18535	146293428	0.04546725	normal
56	9	28046	141118196	0.0308050265604	normal
56	10	60636	135520883	0.0446641294439	normal
56	11	60824	134934174	0.016010970516	normal
56	12	147085	133751883	0.0133725546322	normal
56	13	19020199	115099262	0.0220901589958	normal
56	14	19068113	107278229	0.0357208163265	normal
56	15	20057163	102489663	0.0161589396171	normal
56	16	71631	90267732	0.0518565286299	normal
56	17	5157	27208847	0.0566292333333	normal
56	17	27208847	81055703	0.410406966543	gain
56	18	15050	37501583	0.0619964177363	normal
56	18	37501583	77999803	0.435569275794	gain
56	19	69411	59078979	0.0260261155235	normal
56	20	71424	62949310	0.0379808938172	normal
56	21	10860934	48098938	0.0386574558304	normal
56	22	16050690	51237712	0.0105945977011	normal
56	23	72101	147063485	-0.547474753777	loss
56	23	147063485	155247523	0.0332434825871	normal
57	1	27918	62976207	-0.0110624983943	normal
57	1	62976207	105872174	-0.442043041045	loss
57	1	105872174	249219279	0.102071565217	normal
57	2	25142	67188474	0.379939205496	gain
57	2	67188474	243059305	0.0280784611776	normal
57	3	60710	69234903	-0.462913943254	loss
57	3	69234903	197897317	0.00757023634622	normal
57	4	29861	191026128	-0.00268499144202	normal
57	5	25637	37203536	-0.497382596983	loss
57	5	37203536	180891680	0.0250267666381	normal
57	6	60745	171047376	0.013510748088	normal
57	7	22189	159112461	0.0102433764554	normal
57	8	18535	146293428	0.0251536404494	normal
57	9	28046	141118196	0.0115564541833	normal
57	10	60636	135520883	0.0154153600729	normal
57	11	60824	69831199	0.303345379437	gain
57	11	69831199	134934174	-0.487520345253	loss
57	12	147085	113685077	-0.0161102910149	normal
57	12	113685077	133751883	0.29971388	gain
57	13	19020199	115099262	-0.00245638912134	normal
57	14	19068113	107278229	-0.0124995102041	normal
57	15	20057163	102489663	-0.0299204270987	normal
57	16	71631	90267732	-0.0153569376278	normal
57	17	5157	29687613	-0.0513320090634	normal
57	17	29687613	81055703	0.667720888542	gain
57	18	15050	77999803	0.037384310992	normal
57	19	69411	59078979	-0.113713602888	normal
57	20	71424	62949310	0.0195068884409	normal
57	21	10860934	48098938	0.00541956419317	normal
57	22	16050690	51237712	-0.0456437701149	normal
57	23	72101	155247523	-0.0376932794702	normal
58	1	27918	100454784	-0.396695172414	loss
58	1	100454784	249219279	0.04337256	normal
58	2	25142	15951399	0.068192835443	normal
58	2	15951399	16709317	4.11188058824	ampl
58	2	16709317	21204288	0.0758757142857	normal
58	2	21204288	21636774	4.15114636364	ampl
58	2	21636774	243059305	0.053990055535	normal
58	3	60710	197897317	0.0509094936188	normal
58	4	29861	191026128	0.0463711360719	normal
58	5	25637	180891680	0.0444004718898	normal
58	6	60745	171047376	0.0497720052581	normal
58	7	22189	159112461	0.0453933868047	normal
58	8	18535	146293428	0.0443829578652	normal
58	9	28046	141118196	0.0361279249668	normal
58	10	60636	135520883	0.0482943482224	normal
58	11	60824	134934174	0.0209070577396	normal
58	12	147085	133751883	0.024807654663	normal
58	13	19020199	115099262	-0.258644054393	normal
58	14	19068113	107278229	0.0323158730159	normal
58	15	20057163	102489663	0.019476239568	normal
58	16	71631	90267732	0.0292076482618	normal
58	17	5157	36281829	0.0264779539952	normal
58	17	36281829	81055703	0.519316023235	gain
58	18	15050	77999803	0.050040847185	normal
58	19	69411	59078979	-0.0116351552347	normal
58	20	71424	62949310	0.0439657123656	normal
58	21	10860934	48098938	0.0448813309776	normal
58	22	16050690	51237712	-0.0109485977011	normal
58	23	72101	155247523	-0.542885099338	loss
59	1	27918	109836477	-0.529545795455	loss
59	1	109836477	249219279	0.0222160255967	normal
59	2	25142	15790892	0.00647641943734	normal
59	2	15790892	16909561	4.78297461538	ampl
59	2	16909561	243059305	0.0309937518116	normal
59	3	60710	197897317	0.0189308686702	normal
59	4	29861	191026128	0.104395419341	normal
59	5	25637	180891680	0.0310113501919	normal
59	6	60745	171047376	0.0276535516252	normal
59	7	22189	100350144	0.0368148129676	normal
59	7	100350144	159112461	0.409355942426	gain
59	8	18535	146293428	0.0259534044944	normal
59	9	28046	141118196	0.0225768492696	normal
59	10	60636	135520883	-0.0274661470678	normal
59	11	60824	134934174	0.102493826781	normal
59	12	147085	133751883	0.0360919113573	normal
59	13	19020199	115099262	0.0421845062762	normal
59	14	19068113	107278229	0.0298294421769	normal
59	15	20057163	102489663	0.0201338635248	normal
59	16	71631	90267732	0.00030240797546	normal
59	17	5157	42458087	0.0320751271617	normal
59	17	42458087	81055703	0.389266476091	gain
59	18	15050	77999803	0.0188724504021	normal
59	19	69411	59078979	-0.011183032491	normal
59	20	71424	62949310	0.000799690860215	normal
59	21	10860934	48098938	0.0345207656066	normal
59	22	16050690	51237712	-0.0557212873563	normal
59	23	72101	155247523	-0.608607149669	loss
60	1	27918	97255992	-0.535160608948	loss
60	1	97255992	249219279	0.0691883962559	normal
60	2	25142	15870905	0.0270869720102	normal
60	2	15870905	16425666	3.36395583333	ampl
60	2	16425666	243059305	0.0765481869125	normal
60	3	60710	197897317	0.0538437361054	normal
60	4	29861	191026128	0.066254330338	normal
60	5	25637	180891680	0.0675385256266	normal
60	6	60745	171047376	0.0476079517208	normal
60	7	22189	159112461	0.0261104036223	normal
60	8	18535	146293428	0.0496500224719	normal
60	9	28046	29759857	-0.498899018817	loss
60	9	29759857	141118196	0.06520335097	normal
60	10	60636	135520883	0.0514248769371	normal
60	11	60824	134934174	0.0308217076167	normal
60	12	147085	133751883	0.0399847029855	normal
60	13	19020199	115099262	0.0644518953975	normal
60	14	19068113	107278229	0.0534564671202	normal
60	15	20057163	32939450	0.041937	normal
60	15	32939450	34663927	-0.635917674419	loss
60	15	34663927	87761607	0.0347578415094	normal
60	15	87761607	102489663	0.41891200542	gain
60	16	71631	90267732	0.00893700920245	normal
60	17	5157	81055703	0.00733276606684	normal
60	18	15050	77999803	0.0556348310992	normal
60	19	69411	59078979	-0.0787711768953	normal
60	20	71424	62949310	0.0269318548387	normal
60	21	10860934	48098938	0.0353460895171	normal
60	22	16050690	51237712	-0.0402537701149	normal
60	23	72101	2699891	-0.03808875	normal
60	23	2699891	155247523	-0.631674112099	loss
61	1	27918	249219279	-0.134653970457	normal
61	2	25142	14674827	0.270067134986	gain
61	2	14674827	19828638	1.51405322835	ampl
61	2	19828638	243059305	0.266884378557	gain
61	3	60710	197897317	-0.150371181556	normal
61	4	29861	191026128	0.218745875053	gain
61	5	25637	180891680	-0.142936202303	normal
61	6	60745	171047376	-0.140369486138	normal
61	7	22189	159112461	0.384371011643	gain
61	8	18535	146293428	0.214328196629	gain
61	9	28046	141118196	-0.143464704515	normal
61	10	60636	135520883	-0.0856939562443	normal
61	11	60824	134934174	-0.134365746314	normal
61	12	147085	133751883	-0.0353542351493	normal
61	13	19020199	115099262	-0.168242196653	normal
61	14	19068113	107278229	-0.159266358277	normal
61	15	20057163	102489663	-0.186962307315	normal
61	16	71631	90267732	-0.14986851227	normal
61	17	5157	18947084	0.0938060381356	normal
61	17	18947084	81055703	0.458136931432	gain
61	18	15050	77999803	0.0523198659517	normal
61	19	69411	59078979	-0.162723971119	normal
61	20	71424	62949310	-0.141114247312	normal
61	21	10860934	48098938	-0.136743474676	normal
61	22	16050690	51237712	-0.158010563218	normal
61	23	72101	155247523	0.0655828688742	normal
62	1	27918	97334984	-0.00997043460265	normal
62	1	97334984	249219279	0.369889928192	gain
62	2	25142	44632149	0.686502513514	gain
62	2	44632149	243059305	0.0638240418479	normal
62	3	60710	45908164	-0.522733025283	loss
62	3	45908164	197897317	0.00535270277553	normal
62	4	29861	38633279	-0.532524275132	loss
62	4	38633279	191026128	0.0280179485117	normal
62	5	25637	180891680	0.0477806638067	normal
62	6	60745	171047376	-0.171377664914	normal
62	7	22189	159112461	0.0962501940492	normal
62	8	18535	7002942	-0.560500914286	loss
62	8	7002942	8074907	0.126627272727	normal
62	8	8074907	27880170	-0.523135578093	loss
62	8	27880170	79081518	-0.186387554077	normal
62	8	79081518	142379018	0.0760173951715	normal
62	8	142379018	146293428	0.454170425532	gain
62	9	28046	141118196	-0.136494233068	normal
62	10	60636	135520883	-0.151433366758	normal
62	11	60824	74893034	0.0730612222854	normal
62	11	74893034	134934174	-0.561855724783	loss
62	12	147085	98828737	0.149967528373	normal
62	12	98828737	133751883	0.545298045977	gain
62	13	19020199	115099262	-0.0444682301255	normal
62	14	19068113	107278229	-0.163325433107	normal
62	15	20057163	102489663	-0.153519587629	normal
62	16	71631	90267732	0.130633951943	normal
62	17	5157	41221314	0.424107055731	gain
62	17	41221314	56058903	1.14345174731	gain
62	17	56058903	81055703	0.641359967846	gain
62	18	15050	77999803	0.0796078873995	normal
62	19	69411	59078979	0.0929352779783	normal
62	20	71424	32242603	0.109815207756	normal
62	20	32242603	62949310	0.389871227154	gain
62	21	10860934	48098938	-0.156826077739	normal
62	22	16050690	51237712	0.203684632184	gain
62	23	72101	155247523	-0.620022982781	loss
63	1	27918	249219279	0.0271353336893	normal
63	2	25142	15832792	0.0751859693878	normal
63	2	15832792	16468968	2.49904357143	ampl
63	2	16468968	243059305	0.0960304899656	normal
63	3	60710	197897317	0.0198257122273	normal
63	4	29861	191026128	0.0504439537869	normal
63	5	25637	180891680	0.0329136983518	normal
63	6	60745	37057943	0.0026939762931	normal
63	6	37057943	38429109	0.785739705882	gain
63	6	38429109	43864251	-0.0314577205882	normal
63	6	43864251	44661890	0.6758185	gain
63	6	44661890	55102749	0.0581635249042	normal
63	6	55102749	55942589	0.868012380952	gain
63	6	55942589	70571674	0.0495502816901	normal
63	6	70571674	71295145	0.739107222222	gain
63	6	71295145	162165808	0.0409147570671	normal
63	6	162165808	162689505	0.801330769231	gain
63	6	162689505	171047376	-0.0682149756098	normal
63	7	22189	159112461	0.00298461060802	normal
63	8	18535	146293428	0.0522991825843	normal
63	9	28046	141118196	-0.01704687251	normal
63	10	60636	135520883	-0.00790141294439	normal
63	11	60824	134934174	-0.00393338759214	normal
63	12	147085	133751883	0.0598240566328	normal
63	13	19020199	115099262	0.040856209205	normal
63	14	19068113	107278229	0.0222322494331	normal
63	15	20057163	102489663	-0.0378760579283	normal
63	16	71631	90267732	-0.0162185327198	normal
63	17	5157	81055703	-0.0205331465296	normal
63	18	15050	77999803	0.0715672975871	normal
63	19	69411	59078979	-0.149126137184	normal
63	20	71424	62949310	0.00538780913978	normal
63	21	10860934	48098938	-0.0191826266196	normal
63	22	16050690	51237712	-0.0656067586207	normal
63	23	72101	155247523	-0.584685539073	loss
64	1	27918	249219279	0.129732626802	normal
64	2	25142	243059305	0.131680636685	normal
64	3	60710	124584156	-0.188112064069	normal
64	3	124584156	197897317	0.0867298142077	normal
64	4	29861	191026128	0.0864822700043	normal
64	5	25637	180891680	0.102384066381	normal
64	6	60745	171047376	0.0870147562141	normal
64	7	22189	159112461	0.30205949806	gain
64	8	18535	146293428	-0.198813713483	normal
64	9	28046	141118196	-0.184482828685	normal
64	10	60636	135520883	0.105160917654	normal
64	11	60824	81411746	-0.195800478668	normal
[truncated: 16,607 more rows]
